# Supplementary material
Source: PubMed Central journal article supplement (PMC3598617)
Supplement: NIHMS446170-supplement-supplemental_materials.pdf [file NIHMS446170-supplement-supplemental_materials.pdf]

## **Supplementary Information**

### **Genome-wide meta-analyses of nonsyndromic cleft lip with or without cleft palate identify six new risk loci**

**Authors:** Kerstin U. Ludwig<sup>1,2,30</sup>, Elisabeth Mangold<sup>1,30</sup>, Stefan Herms<sup>1,2</sup>, Stefanie Nowak<sup>1,3</sup>, Heiko Reutter<sup>1,4</sup>, Anna Paul<sup>5,6</sup>, Jessica Becker<sup>1,2</sup>, Ruth Herberz<sup>1,2</sup>, Taofik AlChawa<sup>1,2</sup>, Entessar Nasser<sup>1,2</sup>, Anne C. Böhmer<sup>1,2</sup>, Manuel Mattheisen<sup>1,7,8</sup>, Margrieta A. Alblas<sup>1,2</sup>, Sandra Barth<sup>1,2</sup>, Nadine Kluck<sup>1,2</sup>, Carola Lauster<sup>9</sup>, Bert Braumann<sup>10</sup>, Rudolf H. Reich<sup>11</sup>, Alexander Hemprich<sup>12</sup>, Simone Pötzsch<sup>13</sup>, Bettina Blaumeiser<sup>14</sup>, Nikolaos Daratsianos<sup>15</sup>, Thomas Kreuzsch<sup>16</sup>, Jeffrey C. Murray<sup>17</sup>, Mary L. Marazita<sup>18</sup>, Ingo Ruczinski<sup>19</sup>, Alan F. Scott<sup>20</sup>, Terri H. Beaty<sup>21</sup>, Franz-Josef Kramer<sup>3</sup>, Thomas F. Wienker<sup>22</sup>, Regine P. Steegers-Theunissen<sup>23,24,25,26</sup>, Michele Rubini<sup>27</sup>, Peter A. Mossey<sup>28</sup>, Per Hoffmann<sup>1,2</sup>, Christoph Lange<sup>7,8</sup>, Sven Cichon<sup>1,2,29</sup>, Peter Propping<sup>1</sup>, Michael Knapp<sup>22,31</sup>, Markus M. Nöthen<sup>1,2,31</sup>

<sup>1</sup> Institute of Human Genetics, University of Bonn, Bonn, Germany.

<sup>2</sup> Department of Genomics, Life & Brain Center, University of Bonn, Bonn, Germany.

<sup>3</sup> Department of Oral and Maxillofacial Surgery, University of Göttingen, Göttingen, Germany.

<sup>4</sup> Department of Neonatology, Children's Hospital, University of Bonn, Bonn, Germany.

<sup>5</sup> Department of Otolaryngology, Asklepios Klinik Altona, Hamburg, Germany.

<sup>6</sup> Department for Otolaryngology, Addenbrooke's Hospital, Cambridge University Hospitals NHS Foundation Trust, UK.

<sup>7</sup> Department of Biostatistics, Harvard School of Public Health, Boston, Massachusetts, USA.

<sup>8</sup> Institute for Genomic Mathematics, University of Bonn, Bonn, Germany.

<sup>9</sup> Department of Cleft Lip and Cleft Palate Surgery, Humboldt University of Berlin, Berlin, Germany.

<sup>10</sup> Department of Orthodontics, University of Cologne, Cologne, Germany.

<sup>11</sup> Department of Oral and Maxillo-Facial-Plastic Surgery, University of Bonn, Bonn, Germany.

<sup>12</sup> Department of Oral and Maxillo-Facial Surgery, University of Leipzig, Leipzig, Germany.

<sup>13</sup> Monitoring of Congenital Malformations Saxony Anhalt, University of Magdeburg, Magdeburg, Germany.

<sup>14</sup> Department of Medical Genetics, University Hospital and University of Antwerp, Antwerp, Belgium.

<sup>15</sup> Department of Orthodontics, University of Bonn, Bonn, Germany.

<sup>16</sup> Department of Oral and Maxillofacial Surgery, Head and Neck Centre, Asklepios Klinik Nord, Heidberg, Hamburg, Germany.

<sup>17</sup> Department of Pediatrics, University of Iowa, Iowa City, Iowa, USA.

<sup>18</sup> University of Pittsburgh, Center for Craniofacial and Dental Genetics, School of Dental Medicine, Pittsburgh, Pennsylvania, USA.

<sup>19</sup> Department of Biostatistics, Johns Hopkins University School of Public Health, Baltimore, Maryland, USA.

<sup>20</sup> Institute of Genetic Medicine, Johns Hopkins University, School of Medicine, Baltimore, Maryland, USA.

<sup>21</sup> Department of Epidemiology, Johns Hopkins University, School of Public Health, Baltimore, Maryland, USA.

<sup>22</sup> Institute of Medical Biometry, Informatics and Epidemiology, University of Bonn, Bonn, Germany.

<sup>23</sup> Department of Obstetrics and Gynecology, Erasmus Medical Center, University Medical Center, Rotterdam, The Netherlands.

<sup>24</sup> Department of Epidemiology, Erasmus Medical Center, University Medical Center, Rotterdam, The Netherlands.

<sup>25</sup> Department of Clinical Genetics, Erasmus Medical Center, University Medical Center, Rotterdam, The Netherlands.

<sup>26</sup> Department of Epidemiology, Radboud University Medical Center, Nijmegen, The Netherlands.

<sup>27</sup> Department of Experimental and Diagnostic Medicine, Medical Genetics Unit, University of Ferrara, Ferrara, Italy

<sup>28</sup> Orthodontic Unit, Dental Hospital & School, University of Dundee, Dundee, UK.

<sup>29</sup> Institute of Neuroscience and Medicine (INM-1), Structural and Functional Organization of the Brain, Genomic Imaging, Research Center Jülich, Jülich, Germany.

<sup>30</sup> These authors contributed equally to this work.

<sup>31</sup> These authors jointly directed this work.

Correspondence should be addressed to E.M. (e.mangold@uni-bonn.de).

## Supplementary Methods

### Bonn study

Statistical analysis was identical to the analysis performed in Mangold et al. 2010<sup>1</sup>.

### Baltimore study

To ensure that genotype data from the Bonn-II and the Baltimore datasets were comparable, the following measures were undertaken: (i) for each sample-by-chromosome combination with a chromosomal anomaly and/or a missing call rate per chromosome above 5%, genotype calls were filtered out; (ii) samples with a missing call rate of > 5% were removed; (iii) SNPs with a FALSE-value for the quality flag provided in the ‘SNP analysis results.csv’ (part of the data distributed on dbGaP) were removed.

### Meta-analyses for NSCL/P

The likelihood for the combined sample is the product of: (i) the likelihood conditional on parental genotypes (CPG-likelihood) for case-parent trio data, as previously described<sup>2</sup>, and (ii) the likelihood for the case-control data. The key parameters in the CPG-likelihood calculation are the genotypic relative risks (RRs) for homozygous and heterozygous affected individuals ( $\psi_2$  and  $\psi_1$ , respectively). The corresponding parameters in the likelihood calculation for case-control data are  $\psi_2$  and  $\psi_1$  (since controls in the Bonn-II study were unscreened for NSCL/P), along with the frequency of homozygous and heterozygous individuals in the sample populations. We assumed a multiplicative model (i.e.  $\psi_2 = \psi_1^2$ ), resulting in an asymptotic null distribution of the likelihood ratio test (LRT) statistic of  $Chi^2$  with a single degree of freedom (df). The genomic inflation factor was 1.041 in meta-analysis<sub>Euro</sub> and 1.047 in meta-analysis<sub>all</sub>.

### Imputing at genome-wide significant loci

For each of the newly identified loci, the surrounding region including adjacent recombination hotspots (maximally +/- 500 kb flanking the top SNPs) was imputed using IMPUTE2<sup>3</sup>. For each individual and for each SNP, the most likely predicted genotype above a threshold of 0.8 was assumed. Subsequent statistical analysis was identical to the prior analysis of genotyped SNPs. As suggested by Southam et al. (2011), post-imputation filtering excludes a substantial proportion of SNPs which were inaccurately imputed and, thus, is likely to provide spurious

association results<sup>4</sup>. Accordingly, SNPs with a MAF less/equal than 5% (as estimated from controls and, in the case of trios, the non-transmitted parental alleles) were removed, as well as SNPs for which the respective LD data were not available in HapMap3 and 1000 genomes\_release1.

#### Subgroup analysis

The NSCLO analysis included 79 European cases and 448 parent-child trios (233 Europeans, 215 Asians). The NSCLP analysis included 320 European cases and 1,013 parent-child trios (433 Europeans, 580 Asians). The same European controls were used for both analyses (n=1,318).

A heterogeneity LRT was used to test for heterogeneity of the genotypic RRs between the NSCLO and NSCLP phenotypes. We applied a general model that allowed for arbitrary genotypic RRs, resulting in an asymptotic  $Chi^2$  null distribution with two degrees of freedom.

## Supplementary Tables

**Supplementary Table 1: Asian trio data for the newly reported susceptibility loci.** Transmission distortion *P*-values are reported for SNPs reaching genome-wide significance in the meta-analyses. For all markers except rs1873147, association is in the same direction as in the European case-control and European trio data.

| dbSNP-ID   | Chr. | Position   | T   | NT  | <i>P</i> <sub>TDT</sub>      |
|------------|------|------------|-----|-----|------------------------------|
| rs742071   | 1    | 18,852,461 | 54  | 88  | <b>4.33×10<sup>-03</sup></b> |
| rs7590268  | 2    | 43,393,629 | 75  | 57  | 1.17×10 <sup>-01</sup>       |
| rs7632427  | 3    | 89,617,067 | 168 | 247 | <b>1.05×10<sup>-04</sup></b> |
| rs12543318 | 8    | 88,937,456 | 328 | 406 | <b>3.99×10<sup>-03</sup></b> |
| rs1575900  | 13   | 79,574,705 | 315 | 341 | 3.10×10 <sup>-01</sup>       |
| rs9318679  | 13   | 79,588,136 | 304 | 331 | 2.84×10 <sup>-01</sup>       |
| rs1215465  | 13   | 79,589,353 | 385 | 411 | 3.57×10 <sup>-01</sup>       |
| rs8001641  | 13   | 79,590,812 | 240 | 199 | 5.04×10 <sup>-02</sup>       |
| rs9545330  | 13   | 79,597,167 | 331 | 333 | 9.38×10 <sup>-01</sup>       |
| rs942233   | 13   | 79,599,849 | 343 | 318 | 3.31×10 <sup>-01</sup>       |
| rs1873147  | 15   | 61,099,685 | 197 | 190 | 7.22×10 <sup>-01</sup>       |

Chr. – chromosome, T – number of transmitted alleles, NT – number of non-transmitted alleles, TDT – transmission disequilibrium test, *P*-value in bold if nominally significant.

**Supplementary Table 2: Association results for SNPs in high linkage disequilibrium to genotyped topSNP.** For each locus, SNPs with  $r^2$ -values  $> 0.8$  (based on 1000 genomes\_release 1) are depicted in descending order. GWAS top SNPs are marked in bold. For the 8q21.3 locus, no SNPs with  $r^2 > 0.8$  were available, therefore, SNPs with  $r^2 > 0.5$  have been chosen for this locus. Association results are based on genotyped (G) or imputed (I) SNPs (n.a. - SNP not available after QC; in bold if genome-wide significant).

| Locus         | SNP-ID           | Position (hg18)   | $r^2$ <sup>a</sup> | $D'$ <sup>a</sup> | SNP type <sup>b</sup>  | $P_{meta\_Euro}$                         | $P_{meta\_all}$                          |
|---------------|------------------|-------------------|--------------------|-------------------|------------------------|------------------------------------------|------------------------------------------|
| <b>1p36</b>   | <b>rs742071</b>  | <b>18,852,461</b> | <b>1.000</b>       | <b>1.000</b>      | <b>G</b>               | <b><math>2.63 \times 10^{-07}</math></b> | <b><math>7.02 \times 10^{-09}</math></b> |
|               | rs11583072       | 18,838,594        | 0.967              | 1.000             | I                      | $1.47 \times 10^{-05}$                   | $1.42 \times 10^{-06}$                   |
|               | rs4920524        | 18,850,959        | 0.902              | 1.000             | I                      | $1.53 \times 10^{-06}$                   | <b><math>4.94 \times 10^{-08}</math></b> |
|               | rs9439714        | 18,849,076        | 0.872              | 1.000             | I                      | $2.14 \times 10^{-06}$                   | $7.02 \times 10^{-08}$                   |
|               | rs56675509       | 18,844,221        | 0.872              | 1.000             | I                      | $6.53 \times 10^{-05}$                   | $1.03 \times 10^{-05}$                   |
|               | rs56075776       | 18,859,095        | 0.868              | 0.964             | I                      | $7.71 \times 10^{-06}$                   | $2.16 \times 10^{-06}$                   |
|               | rs9439713        | 18,845,363        | 0.842              | 1.000             | I                      | $2.11 \times 10^{-05}$                   | $2.87 \times 10^{-06}$                   |
|               | rs7364475        | 18,837,648        | 0.842              | 1.000             | I                      | $1.62 \times 10^{-03}$                   | $2.77 \times 10^{-04}$                   |
|               | rs1339063        | 18,862,162        | 0.835              | 0.929             | I                      | $1.33 \times 10^{-06}$                   | $5.84 \times 10^{-06}$                   |
|               | rs4920338        | 18,863,380        | 0.804              | 0.927             | G                      | $1.58 \times 10^{-06}$                   | $8.39 \times 10^{-07}$                   |
| rs4920339     | 18,863,592       | 0.804             | 0.927              | I                 | $1.99 \times 10^{-06}$ | $1.29 \times 10^{-06}$                   |                                          |
| <b>2p21</b>   | <b>rs7590268</b> | <b>43,393,629</b> | <b>1.000</b>       | <b>1.000</b>      | <b>G</b>               | <b><math>4.05 \times 10^{-08}</math></b> | <b><math>1.25 \times 10^{-08}</math></b> |
|               | rs13035011       | 43,397,621        | 1.000              | 1.000             | I                      | $6.19 \times 10^{-08}$                   | <b><math>3.70 \times 10^{-08}</math></b> |
|               | rs35338810       | 43,402,450        | 0.943              | 1.000             | I                      | $1.75 \times 10^{-05}$                   | $6.44 \times 10^{-06}$                   |
|               | rs6544648        | 43,453,562        | 0.895              | 1.000             | I                      | $1.75 \times 10^{-06}$                   | $1.91 \times 10^{-06}$                   |
|               | rs10445925       | 43,523,648        | 0.895              | 1.000             | I                      | $2.30 \times 10^{-06}$                   | $1.40 \times 10^{-06}$                   |
|               | rs35114568       | 43,528,796        | 0.895              | 1.000             | I                      | $2.87 \times 10^{-06}$                   | $1.73 \times 10^{-06}$                   |
|               | rs2046916        | 43,539,711        | 0.895              | 1.000             | I                      | $4.60 \times 10^{-06}$                   | $3.21 \times 10^{-06}$                   |
|               | rs7600177        | 43,481,559        | 0.848              | 1.000             | I                      | $4.56 \times 10^{-06}$                   | $2.65 \times 10^{-06}$                   |
|               | rs6544656        | 43,488,647        | 0.848              | 1.000             | I                      | $3.47 \times 10^{-06}$                   | $2.27 \times 10^{-06}$                   |
|               | rs6729902        | 43,430,472        | 0.836              | 0.941             | I                      | $3.32 \times 10^{-07}$                   | $2.48 \times 10^{-07}$                   |
|               | rs12477823       | 43,473,824        | 0.806              | 1.000             | I                      | $3.19 \times 10^{-06}$                   | $2.15 \times 10^{-06}$                   |
|               | rs7596480        | 43,474,666        | 0.806              | 1.000             | I                      | $3.01 \times 10^{-06}$                   | $1.99 \times 10^{-06}$                   |
| rs6544652     | 43,479,716       | 0.806             | 1.000              | I                 | $3.14 \times 10^{-06}$ | $2.12 \times 10^{-06}$                   |                                          |
| <b>3p11.1</b> | <b>rs7632427</b> | <b>89,617,067</b> | <b>1.000</b>       | <b>1.000</b>      | <b>G</b>               | <b><math>4.20 \times 10^{-05}</math></b> | <b><math>3.90 \times 10^{-08}</math></b> |
|               | rs11918555       | 89,624,624        | 0.967              | 1.000             | I                      | $1.16 \times 10^{-04}$                   | $2.06 \times 10^{-07}$                   |
|               | rs724972         | 89,664,098        | 0.967              | 1.000             | I                      | $2.07 \times 10^{-04}$                   | $3.26 \times 10^{-06}$                   |
|               | rs7652296        | 89,669,952        | 0.935              | 1.000             | I                      | $1.91 \times 10^{-04}$                   | $2.39 \times 10^{-06}$                   |
|               | rs7650184        | 89,612,747        | 0.934              | 0.966             | I                      | $2.10 \times 10^{-04}$                   | $9.08 \times 10^{-07}$                   |
|               | rs12636275       | 89,605,728        | 0.934              | 0.966             | I                      | $1.80 \times 10^{-03}$                   | $7.62 \times 10^{-06}$                   |
|               | rs987748         | 89,576,720        | 0.934              | 0.966             | I                      | $1.26 \times 10^{-03}$                   | $2.12 \times 10^{-04}$                   |
|               | rs7637670        | 89,575,857        | 0.934              | 0.966             | G                      | $2.56 \times 10^{-03}$                   | $3.22 \times 10^{-04}$                   |
|               | rs2117137        | 89,608,195        | 0.901              | 0.965             | G                      | $9.51 \times 10^{-04}$                   | $7.76 \times 10^{-06}$                   |
|               | rs35124509       | 89,604,383        | 0.901              | 0.965             | I                      | $1.30 \times 10^{-03}$                   | $9.68 \times 10^{-06}$                   |
|               | rs6771054        | 89,572,219        | 0.901              | 0.965             | I                      | $2.48 \times 10^{-03}$                   | $3.63 \times 10^{-04}$                   |
|               | rs73153219       | 89,708,592        | 0.901              | 0.965             | -                      | n.a.                                     | n.a.                                     |
|               | rs6795325        | 89,724,744        | 0.901              | 0.965             | I                      | $4.45 \times 10^{-04}$                   | $9.03 \times 10^{-07}$                   |
|               | rs7621573        | 89,677,942        | 0.870              | 0.964             | I                      | $4.22 \times 10^{-04}$                   | $3.05 \times 10^{-07}$                   |
|               | rs67316928       | 89,564,924        | 0.869              | 0.932             | -                      | n.a.                                     | n.a.                                     |
|               | rs73145338       | 89,677,457        | 0.869              | 0.932             | -                      | n.a.                                     | n.a.                                     |
|               | rs10511145       | 89,680,369        | 0.869              | 0.932             | G                      | $4.01 \times 10^{-04}$                   | $3.59 \times 10^{-07}$                   |
|               | rs7632502        | 89,552,143        | 0.869              | 0.932             | I                      | $3.23 \times 10^{-03}$                   | $1.23 \times 10^{-03}$                   |
| rs11921985    | 89,550,047       | 0.869             | 0.932              | I                 | $1.45 \times 10^{-02}$ | $8.12 \times 10^{-03}$                   |                                          |

|                               |                   |                   |              |              |                        |                                          |                                          |
|-------------------------------|-------------------|-------------------|--------------|--------------|------------------------|------------------------------------------|------------------------------------------|
| <b>3p11.1<br/>(continued)</b> | rs7635916         | 89,715,830        | 0.869        | 0.932        |                        | $4.44 \times 10^{-04}$                   | $5.16 \times 10^{-07}$                   |
|                               | rs6551413         | 89,723,040        | 0.869        | 0.932        |                        | $4.44 \times 10^{-04}$                   | $5.82 \times 10^{-07}$                   |
|                               | rs1520596         | 89,728,232        | 0.869        | 0.932        |                        | $4.31 \times 10^{-04}$                   | $1.45 \times 10^{-06}$                   |
|                               | rs66499884        | 89,741,702        | 0.869        | 0.932        | -                      | n.a.                                     | n.a.                                     |
|                               | rs35968370        | 89,549,029        | 0.837        | 0.930        |                        | $4.28 \times 10^{-03}$                   | $8.43 \times 10^{-04}$                   |
|                               | rs17027018        | 89,687,464        | 0.837        | 0.930        |                        | $3.13 \times 10^{-04}$                   | $2.96 \times 10^{-07}$                   |
|                               | rs3792572         | 89,539,245        | 0.837        | 0.930        |                        | $8.73 \times 10^{-03}$                   | $5.11 \times 10^{-03}$                   |
|                               | rs55747880        | 89,695,631        | 0.837        | 0.930        |                        | $3.22 \times 10^{-04}$                   | $1.20 \times 10^{-06}$                   |
|                               | rs6772953         | 89,534,411        | 0.837        | 0.930        |                        | $5.21 \times 10^{-03}$                   | $1.37 \times 10^{-03}$                   |
|                               | rs60243237        | 89,776,743        | 0.837        | 0.930        |                        | $5.17 \times 10^{-04}$                   | $4.99 \times 10^{-06}$                   |
|                               | rs11925143        | 89,806,374        | 0.837        | 0.930        |                        | $4.66 \times 10^{-04}$                   | $4.47 \times 10^{-06}$                   |
|                               | rs7613412         | 89,806,907        | 0.837        | 0.930        |                        | $4.66 \times 10^{-04}$                   | $4.47 \times 10^{-06}$                   |
|                               | rs59381722        | 89,784,172        | 0.805        | 0.897        |                        | $9.34 \times 10^{-04}$                   | $9.36 \times 10^{-06}$                   |
|                               | rs6551415         | 89,787,851        | 0.805        | 0.897        |                        | $3.70 \times 10^{-04}$                   | $2.39 \times 10^{-06}$                   |
|                               | rs6806912         | 89,834,043        | 0.805        | 0.897        |                        | $3.97 \times 10^{-04}$                   | $1.28 \times 10^{-06}$                   |
| <b>8q21.3</b>                 | <b>rs12543318</b> | <b>88,937,456</b> | <b>1.000</b> | <b>1.000</b> | <b>G</b>               | <b><math>1.02 \times 10^{-06}</math></b> | <b><math>1.90 \times 10^{-08}</math></b> |
|                               | rs1911665         | 88,965,596        | 0.772        | 0.925        |                        | $3.86 \times 10^{-04}$                   | $3.39 \times 10^{-04}$                   |
|                               | rs7839686         | 88,994,844        | 0.772        | 0.925        |                        | $2.60 \times 10^{-04}$                   | $5.52 \times 10^{-04}$                   |
|                               | rs4400429         | 89,039,798        | 0.713        | 0.921        |                        | $1.09 \times 10^{-04}$                   | $3.75 \times 10^{-04}$                   |
|                               | rs6469114         | 89,018,858        | 0.647        | 1.000        |                        | $9.67 \times 10^{-04}$                   | $1.00 \times 10^{-04}$                   |
|                               | rs2664364         | 89,086,684        | 0.630        | 0.913        | G                      | $5.33 \times 10^{-04}$                   | $2.72 \times 10^{-03}$                   |
|                               | rs2664366         | 89,093,956        | 0.630        | 0.913        | G                      | $1.24 \times 10^{-03}$                   | $5.24 \times 10^{-03}$                   |
|                               | rs11786656        | 88,973,474        | 0.605        | 1.000        |                        | $7.69 \times 10^{-04}$                   | $1.13 \times 10^{-05}$                   |
|                               | rs1034832         | 88,987,447        | 0.595        | 0.912        |                        | $1.19 \times 10^{-03}$                   | $4.89 \times 10^{-05}$                   |
|                               | rs2337160         | 89,031,182        | 0.595        | 0.912        |                        | $1.30 \times 10^{-03}$                   | $1.39 \times 10^{-04}$                   |
|                               | rs1477915         | 89,050,656        | 0.595        | 0.912        | G                      | $5.35 \times 10^{-04}$                   | $7.15 \times 10^{-05}$                   |
|                               | rs6995841         | 89,052,352        | 0.595        | 0.912        |                        | $1.18 \times 10^{-03}$                   | $6.46 \times 10^{-04}$                   |
| rs2664371                     | 89,126,078        | 0.508             | 0.791        |              | $1.58 \times 10^{-03}$ | $3.46 \times 10^{-03}$                   |                                          |
| <b>13q31.1</b>                | <b>rs8001641</b>  | <b>79,590,812</b> | <b>1.000</b> | <b>1.000</b> | <b>G</b>               | <b><math>6.20 \times 10^{-10}</math></b> | <b><math>2.62 \times 10^{-10}</math></b> |
|                               | rs1409904         | 79,587,878        | 1.000        | 1.000        |                        | $9.41 \times 10^{-10}$                   | $3.77 \times 10^{-10}$                   |
|                               | rs17215941        | 79,596,989        | 1.000        | 1.000        |                        | $2.72 \times 10^{-10}$                   | $7.98 \times 10^{-11}$                   |
|                               | rs9601323         | 79,598,398        | 1.000        | 1.000        |                        | $2.00 \times 10^{-10}$                   | $5.11 \times 10^{-11}$                   |
|                               | rs11842594        | 79,599,077        | 1.000        | 1.000        |                        | $1.67 \times 10^{-10}$                   | $3.83 \times 10^{-11}$                   |
|                               | rs1854110         | 79,599,486        | 1.000        | 1.000        |                        | $9.34 \times 10^{-11}$                   | $1.96 \times 10^{-11}$                   |
|                               | rs11841646        | 79,577,303        | 0.935        | 1.000        |                        | $7.24 \times 10^{-10}$                   | $4.71 \times 10^{-11}$                   |
|                               | rs11617692        | 79,595,436        | 0.875        | 1.000        |                        | $2.66 \times 10^{-09}$                   | $8.43 \times 10^{-08}$                   |
| rs73241018                    | 79,581,765        | 0.870             | 0.965        | -            | n.a.                   | n.a.                                     |                                          |
| <b>15q22.2</b>                | <b>rs1873147</b>  | <b>61,099,685</b> | <b>1.000</b> | <b>1.000</b> | <b>G</b>               | <b><math>2.81 \times 10^{-08}</math></b> | <b><math>7.92 \times 10^{-07}</math></b> |
|                               | rs7179658         | 61,099,748        | 1.000        | 1.000        |                        | $2.13 \times 10^{-08}$                   | $6.54 \times 10^{-07}$                   |
|                               | rs1873149         | 61,099,481        | 1.000        | 1.000        |                        | $1.83 \times 10^{-08}$                   | $5.83 \times 10^{-07}$                   |
|                               | rs4774470         | 61,099,172        | 1.000        | 1.000        |                        | $2.05 \times 10^{-08}$                   | $6.34 \times 10^{-07}$                   |
|                               | rs4775601         | 61,099,033        | 1.000        | 1.000        |                        | $2.35 \times 10^{-08}$                   | $8.86 \times 10^{-07}$                   |
|                               | rs4775600         | 61,098,993        | 1.000        | 1.000        |                        | $2.17 \times 10^{-08}$                   | $6.46 \times 10^{-07}$                   |
|                               | rs4774469         | 61,098,980        | 1.000        | 1.000        |                        | $2.17 \times 10^{-08}$                   | $6.46 \times 10^{-07}$                   |
|                               | rs12440411        | 61,100,634        | 1.000        | 1.000        |                        | $1.76 \times 10^{-08}$                   | $5.65 \times 10^{-07}$                   |
|                               | rs12443285        | 61,100,649        | 1.000        | 1.000        |                        | $1.76 \times 10^{-08}$                   | $5.65 \times 10^{-07}$                   |
|                               | rs12443295        | 61,100,719        | 1.000        | 1.000        |                        | $2.05 \times 10^{-08}$                   | $6.34 \times 10^{-07}$                   |
|                               | rs4775599         | 61,098,548        | 1.000        | 1.000        |                        | $6.79 \times 10^{-09}$                   | $2.67 \times 10^{-07}$                   |
|                               | rs2130165         | 61,101,572        | 1.000        | 1.000        |                        | $1.71 \times 10^{-08}$                   | $5.83 \times 10^{-07}$                   |
|                               | rs4774467         | 61,098,478        | 0.954        | 1.000        |                        | $8.10 \times 10^{-09}$                   | $3.20 \times 10^{-07}$                   |
|                               | rs2899687         | 61,112,601        | 0.861        | 1.000        |                        | $4.40 \times 10^{-06}$                   | $2.46 \times 10^{-05}$                   |

**Supplementary Table 3: List of SNPs showing  $P < 10^{-04}$  in either the European meta-analysis (Euro) or in the combined European/Asian meta-analysis (all).**

| dbSNP-ID   | Alleles <sup>1</sup> | Chr. | Position  | $P_{\text{meta\_Euro}}$ | $P_{\text{meta\_all}}$ |
|------------|----------------------|------|-----------|-------------------------|------------------------|
| rs4920520  | A/G                  | 1    | 18802429  | $5.44 \times 10^{-06}$  | $6.45 \times 10^{-06}$ |
| rs4920522  | C/T*                 | 1    | 18812967  | $7.41 \times 10^{-07}$  | $9.41 \times 10^{-07}$ |
| rs17352100 | T/C                  | 1    | 18824699  | $5.76 \times 10^{-06}$  | $3.25 \times 10^{-07}$ |
| rs766325   | G/A*                 | 1    | 18829045  | $7.51 \times 10^{-06}$  | $7.39 \times 10^{-07}$ |
| rs6695765  | T/C*                 | 1    | 18851907  | $6.67 \times 10^{-06}$  | $1.12 \times 10^{-06}$ |
| rs742071   | T/G                  | 1    | 18852461  | $2.63 \times 10^{-07}$  | $7.02 \times 10^{-09}$ |
| rs6659735  | G/A*                 | 1    | 18856284  | $5.84 \times 10^{-06}$  | $1.36 \times 10^{-06}$ |
| rs4920338  | T/C                  | 1    | 18863380  | $1.58 \times 10^{-06}$  | $8.39 \times 10^{-07}$ |
| rs3748748  | A/G                  | 1    | 19890782  | $8.81 \times 10^{-05}$  | $4.78 \times 10^{-04}$ |
| rs427371   | T/C                  | 1    | 40655853  | $4.66 \times 10^{-05}$  | $1.87 \times 10^{-04}$ |
| rs521538   | A/G                  | 1    | 94298211  | $3.84 \times 10^{-04}$  | $1.25 \times 10^{-05}$ |
| rs1191232  | T/C                  | 1    | 94303780  | $4.53 \times 10^{-05}$  | $8.67 \times 10^{-06}$ |
| rs560426   | G/A                  | 1    | 94326026  | $1.02 \times 10^{-06}$  | $3.14 \times 10^{-12}$ |
| rs563429   | C/T                  | 1    | 94326454  | $3.85 \times 10^{-04}$  | $6.33 \times 10^{-05}$ |
| rs952499   | C/T*                 | 1    | 94331013  | $4.36 \times 10^{-05}$  | $7.18 \times 10^{-08}$ |
| rs4147812  | G/T                  | 1    | 94347631  | $8.37 \times 10^{-08}$  | $9.90 \times 10^{-10}$ |
| rs2297634  | G/A*                 | 1    | 94349556  | $3.15 \times 10^{-04}$  | $4.39 \times 10^{-05}$ |
| rs3789451  | T/C                  | 1    | 94358916  | $6.11 \times 10^{-05}$  | $3.56 \times 10^{-07}$ |
| rs11802196 | C/A                  | 1    | 94366631  | $2.53 \times 10^{-04}$  | $1.55 \times 10^{-06}$ |
| rs6686599  | A/G                  | 1    | 94369419  | $3.37 \times 10^{-04}$  | $1.96 \times 10^{-06}$ |
| rs1931565  | T/C                  | 1    | 94369455  | $1.51 \times 10^{-04}$  | $1.02 \times 10^{-05}$ |
| rs1411701  | A/G                  | 1    | 94407616  | $1.01 \times 10^{-06}$  | $5.88 \times 10^{-07}$ |
| rs6541340  | C/T                  | 1    | 94451100  | $1.01 \times 10^{-06}$  | $1.45 \times 10^{-05}$ |
| rs3789688  | A/G                  | 1    | 94463828  | $1.17 \times 10^{-06}$  | $2.46 \times 10^{-06}$ |
| rs11165110 | A/G                  | 1    | 94525057  | $8.81 \times 10^{-06}$  | $1.02 \times 10^{-04}$ |
| rs2172133  | T/C                  | 1    | 94575620  | $6.21 \times 10^{-06}$  | $1.61 \times 10^{-05}$ |
| rs12057415 | T/C                  | 1    | 94602357  | $6.13 \times 10^{-07}$  | $2.05 \times 10^{-06}$ |
| rs2391467  | T/C                  | 1    | 94623031  | $8.14 \times 10^{-07}$  | $1.10 \times 10^{-06}$ |
| rs12047510 | C/T                  | 1    | 161108826 | $1.86 \times 10^{-02}$  | $5.36 \times 10^{-05}$ |
| rs11119328 | A/C                  | 1    | 207951941 | $6.53 \times 10^{-04}$  | $8.12 \times 10^{-05}$ |
| rs3765240  | A/G                  | 1    | 207984774 | $6.19 \times 10^{-05}$  | $8.00 \times 10^{-06}$ |
| rs627670   | G/A                  | 1    | 207995922 | $2.34 \times 10^{-04}$  | $1.04 \times 10^{-05}$ |
| rs909710   | A/G                  | 1    | 207997317 | $2.75 \times 10^{-04}$  | $8.79 \times 10^{-06}$ |
| rs17015169 | T/C                  | 1    | 208003537 | $1.34 \times 10^{-04}$  | $8.14 \times 10^{-09}$ |
| rs590223   | G/A                  | 1    | 208013330 | $3.48 \times 10^{-04}$  | $1.92 \times 10^{-06}$ |
| rs2073485  | A/G                  | 1    | 208029417 | $9.30 \times 10^{-02}$  | $2.12 \times 10^{-10}$ |
| rs861020   | A/G                  | 1    | 208043734 | $1.78 \times 10^{-06}$  | $3.24 \times 10^{-12}$ |
| rs126280   | A/G                  | 1    | 208086447 | $8.42 \times 10^{-06}$  | $8.11 \times 10^{-11}$ |
| rs6689839  | G/A                  | 1    | 208093649 | $1.21 \times 10^{-02}$  | $1.98 \times 10^{-05}$ |
| rs2064163  | T/G                  | 1    | 208115442 | $2.37 \times 10^{-01}$  | $2.08 \times 10^{-08}$ |
| rs932347   | T/C                  | 1    | 208122253 | $8.33 \times 10^{-04}$  | $1.38 \times 10^{-06}$ |
| rs4844913  | A/G                  | 1    | 208134740 | $9.62 \times 10^{-02}$  | $7.99 \times 10^{-07}$ |
| rs9429830  | T/C                  | 1    | 208177160 | $3.31 \times 10^{-02}$  | $2.20 \times 10^{-07}$ |
| rs227178   | A/G                  | 1    | 208283569 | $8.36 \times 10^{-02}$  | $1.01 \times 10^{-06}$ |
| rs2485893  | A/G                  | 1    | 208414778 | $6.50 \times 10^{-02}$  | $8.86 \times 10^{-07}$ |
| rs10779526 | T/C                  | 1    | 208418819 | $6.65 \times 10^{-02}$  | $8.18 \times 10^{-07}$ |
| rs12094311 | G/A                  | 1    | 208435759 | $1.88 \times 10^{-02}$  | $8.89 \times 10^{-08}$ |
| rs12060567 | A/G                  | 1    | 208437213 | $1.33 \times 10^{-02}$  | $1.62 \times 10^{-07}$ |
| rs6428942  | C/T                  | 1    | 243885338 | $1.37 \times 10^{-05}$  | $1.95 \times 10^{-02}$ |
| rs2282381  | A/C                  | 1    | 243907032 | $2.61 \times 10^{-05}$  | $9.86 \times 10^{-03}$ |
| rs4832647  | G/A                  | 2    | 16568877  | $4.64 \times 10^{-03}$  | $9.40 \times 10^{-05}$ |
| rs4497881  | A/C                  | 2    | 16570372  | $2.49 \times 10^{-04}$  | $1.77 \times 10^{-06}$ |



|            |      |   |           |                        |                        |
|------------|------|---|-----------|------------------------|------------------------|
| rs4441471  | G/A  | 2 | 16578889  | $1.78 \times 10^{-04}$ | $7.70 \times 10^{-07}$ |
| rs15653    | A/G  | 2 | 16594991  | $3.12 \times 10^{-04}$ | $5.35 \times 10^{-06}$ |
| rs4952315  | G/T  | 2 | 32961969  | $6.90 \times 10^{-05}$ | $9.32 \times 10^{-02}$ |
| rs4952316  | C/A  | 2 | 32967622  | $1.28 \times 10^{-05}$ | $1.58 \times 10^{-02}$ |
| rs4952548  | A/C  | 2 | 42017719  | $7.82 \times 10^{-05}$ | $1.21 \times 10^{-04}$ |
| rs6749927  | G/A  | 2 | 43338060  | $1.00 \times 10^{-04}$ | $2.92 \times 10^{-05}$ |
| rs7561670  | A/G  | 2 | 43359763  | $9.33 \times 10^{-04}$ | $1.60 \times 10^{-05}$ |
| rs11900952 | A/G  | 2 | 43367540  | $4.72 \times 10^{-05}$ | $1.03 \times 10^{-06}$ |
| rs7590268  | G/T  | 2 | 43393629  | $4.05 \times 10^{-08}$ | $1.25 \times 10^{-08}$ |
| rs17030752 | C/T  | 2 | 43483997  | $1.18 \times 10^{-04}$ | $7.02 \times 10^{-05}$ |
| rs9677398  | A/C  | 2 | 43487639  | $3.77 \times 10^{-06}$ | $3.78 \times 10^{-06}$ |
| rs1873555  | C/T  | 2 | 43633169  | $1.02 \times 10^{-04}$ | $2.52 \times 10^{-05}$ |
| rs6725776  | G/A  | 2 | 43636645  | $2.56 \times 10^{-04}$ | $3.95 \times 10^{-05}$ |
| rs10211106 | T/C  | 2 | 43651557  | $3.70 \times 10^{-04}$ | $7.83 \times 10^{-05}$ |
| rs11897432 | A/G  | 2 | 43671009  | $3.41 \times 10^{-06}$ | $2.36 \times 10^{-06}$ |
| rs17335631 | A/C  | 2 | 43727009  | $6.77 \times 10^{-05}$ | $1.44 \times 10^{-04}$ |
| rs7592384  | G/T* | 2 | 43779969  | $9.27 \times 10^{-06}$ | $5.27 \times 10^{-04}$ |
| rs4952676  | G/A* | 2 | 43783487  | $2.09 \times 10^{-05}$ | $4.19 \times 10^{-04}$ |
| rs4953002  | T/C* | 2 | 43784680  | $2.77 \times 10^{-05}$ | $5.75 \times 10^{-04}$ |
| rs1446232  | T/C  | 2 | 138164301 | $6.81 \times 10^{-05}$ | $7.67 \times 10^{-03}$ |
| rs11680805 | C/T  | 2 | 138188187 | $4.91 \times 10^{-05}$ | $5.69 \times 10^{-02}$ |
| rs10496787 | T/C  | 2 | 138200825 | $5.73 \times 10^{-05}$ | $1.09 \times 10^{-02}$ |
| rs1446226  | T/C  | 2 | 138201519 | $5.49 \times 10^{-05}$ | $1.25 \times 10^{-02}$ |
| rs1112964  | C/T  | 2 | 145816763 | $8.53 \times 10^{-05}$ | $6.75 \times 10^{-02}$ |
| rs10445672 | C/T  | 2 | 145821724 | $3.81 \times 10^{-05}$ | $3.27 \times 10^{-02}$ |
| rs6715297  | C/T  | 2 | 180105114 | $6.47 \times 10^{-05}$ | $8.13 \times 10^{-02}$ |
| rs1400822  | G/T  | 2 | 180105700 | $1.66 \times 10^{-05}$ | $4.06 \times 10^{-02}$ |
| rs6436163  | C/T  | 2 | 220312143 | $4.22 \times 10^{-05}$ | $1.51 \times 10^{-05}$ |
| rs1364701  | G/A* | 2 | 220366080 | $7.69 \times 10^{-04}$ | $8.33 \times 10^{-05}$ |
| rs982693   | A/C* | 2 | 220367882 | $5.90 \times 10^{-04}$ | $6.54 \times 10^{-05}$ |
| rs719325   | A/G  | 2 | 220376177 | $5.44 \times 10^{-04}$ | $5.00 \times 10^{-05}$ |
| rs3815854  | A/G* | 2 | 220376982 | $4.88 \times 10^{-05}$ | $7.02 \times 10^{-06}$ |
| rs992871   | C/T* | 2 | 220397828 | $5.48 \times 10^{-05}$ | $1.29 \times 10^{-05}$ |
| rs12477147 | G/T  | 2 | 221775394 | $1.84 \times 10^{-03}$ | $7.33 \times 10^{-05}$ |
| rs4858297  | G/A  | 3 | 21216152  | $6.97 \times 10^{-05}$ | $3.13 \times 10^{-02}$ |
| rs6550573  | G/T  | 3 | 21237353  | $3.90 \times 10^{-05}$ | $2.21 \times 10^{-02}$ |
| rs6795970  | A/G  | 3 | 38741679  | $9.01 \times 10^{-05}$ | $9.80 \times 10^{-04}$ |
| rs6798015  | C/T  | 3 | 38773840  | $1.33 \times 10^{-05}$ | $4.21 \times 10^{-05}$ |
| rs7430439  | G/A  | 3 | 38778643  | $9.10 \times 10^{-05}$ | $1.22 \times 10^{-03}$ |
| rs1512912  | A/G  | 3 | 89390621  | $9.47 \times 10^{-05}$ | $2.81 \times 10^{-03}$ |
| rs1040017  | C/A  | 3 | 89412322  | $3.12 \times 10^{-05}$ | $8.63 \times 10^{-04}$ |
| rs7633500  | A/G  | 3 | 89579772  | $2.12 \times 10^{-03}$ | $7.35 \times 10^{-05}$ |
| rs2117137  | C/T  | 3 | 89608195  | $9.51 \times 10^{-04}$ | $7.76 \times 10^{-06}$ |
| rs7632427  | C/T  | 3 | 89617067  | $4.20 \times 10^{-05}$ | $3.90 \times 10^{-08}$ |
| rs6774870  | T/C  | 3 | 89647581  | $1.65 \times 10^{-04}$ | $8.24 \times 10^{-06}$ |
| rs907548   | A/G  | 3 | 89657542  | $1.83 \times 10^{-04}$ | $9.84 \times 10^{-06}$ |
| rs10511145 | T/G  | 3 | 89680369  | $4.01 \times 10^{-04}$ | $3.59 \times 10^{-07}$ |
| rs668668   | C/T  | 3 | 100919114 | $2.31 \times 10^{-03}$ | $2.65 \times 10^{-06}$ |
| rs694429   | G/A  | 3 | 100942359 | $7.92 \times 10^{-03}$ | $2.23 \times 10^{-05}$ |
| rs792829   | G/A  | 3 | 100945337 | $2.87 \times 10^{-03}$ | $5.67 \times 10^{-06}$ |
| rs792841   | G/T  | 3 | 100953998 | $7.79 \times 10^{-03}$ | $3.69 \times 10^{-05}$ |
| rs792835   | T/C* | 3 | 100958985 | $1.70 \times 10^{-03}$ | $2.82 \times 10^{-06}$ |
| rs704570   | T/C  | 3 | 100959832 | $3.59 \times 10^{-03}$ | $1.70 \times 10^{-06}$ |
| rs704574   | G/A* | 3 | 100966463 | $1.87 \times 10^{-03}$ | $2.56 \times 10^{-06}$ |
| rs1038294  | T/C  | 3 | 100986418 | $7.93 \times 10^{-03}$ | $2.17 \times 10^{-05}$ |
| rs793494   | T/C  | 3 | 100991458 | $5.71 \times 10^{-03}$ | $2.33 \times 10^{-05}$ |

|            |      |   |           |                        |                        |
|------------|------|---|-----------|------------------------|------------------------|
| rs1287283  | A/G  | 3 | 100998440 | $1.11 \times 10^{-02}$ | $7.56 \times 10^{-05}$ |
| rs813218   | G/A* | 3 | 101075286 | $4.49 \times 10^{-04}$ | $1.29 \times 10^{-06}$ |
| rs1384062  | G/T  | 3 | 101080618 | $2.03 \times 10^{-03}$ | $2.82 \times 10^{-06}$ |
| rs793440   | T/C  | 3 | 101125866 | $7.74 \times 10^{-03}$ | $3.91 \times 10^{-05}$ |
| rs13317017 | A/C  | 3 | 101148211 | $5.75 \times 10^{-03}$ | $2.39 \times 10^{-05}$ |
| rs4244713  | T/G  | 3 | 101162274 | $8.11 \times 10^{-03}$ | $3.00 \times 10^{-05}$ |
| rs766778   | C/T  | 3 | 101234170 | $1.70 \times 10^{-03}$ | $1.92 \times 10^{-06}$ |
| rs12629505 | A/G  | 3 | 101387473 | $6.21 \times 10^{-03}$ | $9.23 \times 10^{-05}$ |
| rs9857793  | T/C  | 3 | 101669652 | $9.68 \times 10^{-05}$ | $2.47 \times 10^{-02}$ |
| rs1515496  | G/A  | 3 | 190991260 | $9.67 \times 10^{-05}$ | $3.15 \times 10^{-03}$ |
| rs3843376  | C/T* | 3 | 198298821 | $6.70 \times 10^{-04}$ | $7.85 \times 10^{-05}$ |
| rs12632536 | C/T  | 3 | 198318047 | $1.65 \times 10^{-04}$ | $5.84 \times 10^{-05}$ |
| rs1134986  | A/G  | 3 | 198349639 | $4.06 \times 10^{-04}$ | $7.42 \times 10^{-05}$ |
| rs10489880 | C/T  | 3 | 198445583 | $9.67 \times 10^{-05}$ | $6.41 \times 10^{-05}$ |
| rs338186   | T/C  | 3 | 198448009 | $2.63 \times 10^{-04}$ | $4.06 \times 10^{-05}$ |
| rs6830734  | C/T  | 4 | 4703905   | $9.34 \times 10^{-05}$ | $3.49 \times 10^{-05}$ |
| rs1907989  | C/T  | 4 | 4869826   | $1.24 \times 10^{-02}$ | $7.66 \times 10^{-05}$ |
| rs1105886  | T/C  | 4 | 41306332  | $5.86 \times 10^{-05}$ | $4.53 \times 10^{-05}$ |
| rs6840263  | A/C  | 4 | 94927934  | $1.89 \times 10^{-05}$ | $2.19 \times 10^{-04}$ |
| rs270552   | C/T  | 5 | 38074102  | $3.85 \times 10^{-04}$ | $7.38 \times 10^{-05}$ |
| rs270550   | T/C  | 5 | 38075952  | $1.63 \times 10^{-04}$ | $6.58 \times 10^{-05}$ |
| rs4348193  | T/G  | 5 | 77671476  | $8.01 \times 10^{-06}$ | $1.06 \times 10^{-02}$ |
| rs4704506  | G/T  | 5 | 77690583  | $1.42 \times 10^{-05}$ | $5.96 \times 10^{-02}$ |
| rs4360024  | C/T  | 5 | 77719962  | $1.85 \times 10^{-05}$ | $1.37 \times 10^{-01}$ |
| rs4703516  | T/G  | 5 | 80690722  | $3.33 \times 10^{-04}$ | $2.72 \times 10^{-06}$ |
| rs388383   | T/C  | 5 | 111731534 | $7.94 \times 10^{-05}$ | $1.37 \times 10^{-04}$ |
| rs9327783  | A/G  | 5 | 136671767 | $4.13 \times 10^{-04}$ | $6.62 \times 10^{-05}$ |
| rs1981973  | C/T  | 5 | 157916350 | $1.93 \times 10^{-05}$ | $1.08 \times 10^{-03}$ |
| rs1650504  | A/G  | 5 | 157962128 | $9.54 \times 10^{-06}$ | $2.75 \times 10^{-03}$ |
| rs4242182  | T/C  | 5 | 174088774 | $9.16 \times 10^{-05}$ | $4.11 \times 10^{-05}$ |
| rs9405785  | G/A  | 6 | 4860027   | $7.78 \times 10^{-04}$ | $8.30 \times 10^{-05}$ |
| rs17763231 | T/C  | 6 | 7419342   | $1.52 \times 10^{-02}$ | $8.55 \times 10^{-05}$ |
| rs616879   | G/T  | 6 | 10500486  | $2.20 \times 10^{-05}$ | $4.30 \times 10^{-05}$ |
| rs2182337  | T/C  | 6 | 11343668  | $3.33 \times 10^{-05}$ | $1.95 \times 10^{-03}$ |
| rs2535238  | T/G  | 6 | 29753017  | $1.44 \times 10^{-04}$ | $7.07 \times 10^{-05}$ |
| rs2747457  | G/T  | 6 | 29764396  | $1.61 \times 10^{-04}$ | $5.68 \times 10^{-05}$ |
| rs3094621  | G/A  | 6 | 30436732  | $9.44 \times 10^{-05}$ | $1.93 \times 10^{-05}$ |
| rs3095314  | A/G  | 6 | 31197610  | $2.17 \times 10^{-05}$ | $2.03 \times 10^{-04}$ |
| rs1591514  | T/C  | 6 | 76286674  | $8.50 \times 10^{-05}$ | $6.07 \times 10^{-03}$ |
| rs4895890  | T/C  | 6 | 130982926 | $3.28 \times 10^{-03}$ | $5.83 \times 10^{-05}$ |
| rs538017   | C/T  | 6 | 151358885 | $2.88 \times 10^{-05}$ | $7.13 \times 10^{-03}$ |
| rs1028651  | A/G  | 6 | 152979558 | $1.82 \times 10^{-05}$ | $5.44 \times 10^{-03}$ |
| rs1028650  | C/A  | 6 | 152979718 | $1.77 \times 10^{-05}$ | $6.31 \times 10^{-03}$ |
| rs1631293  | T/C  | 6 | 152981579 | $6.71 \times 10^{-05}$ | $3.05 \times 10^{-03}$ |
| rs1744385  | T/C  | 6 | 152982159 | $3.15 \times 10^{-05}$ | $6.39 \times 10^{-03}$ |
| rs1631457  | G/A  | 6 | 152988207 | $2.56 \times 10^{-05}$ | $2.76 \times 10^{-03}$ |
| rs2758805  | A/G  | 6 | 153000994 | $3.68 \times 10^{-06}$ | $1.24 \times 10^{-02}$ |
| rs1830642  | T/C  | 6 | 153005519 | $3.40 \times 10^{-06}$ | $1.19 \times 10^{-02}$ |
| rs2758811  | G/A  | 6 | 153006098 | $3.17 \times 10^{-06}$ | $1.16 \times 10^{-02}$ |
| rs2758812  | C/T  | 6 | 153007601 | $4.98 \times 10^{-05}$ | $2.10 \times 10^{-02}$ |
| rs2258974  | A/G  | 6 | 153016243 | $3.09 \times 10^{-05}$ | $3.34 \times 10^{-04}$ |
| rs2996635  | T/C  | 6 | 153052856 | $5.99 \times 10^{-05}$ | $9.65 \times 10^{-03}$ |
| rs2038616  | G/A  | 6 | 153064367 | $2.61 \times 10^{-06}$ | $4.33 \times 10^{-03}$ |
| rs4725033  | C/T  | 7 | 7820533   | $2.92 \times 10^{-02}$ | $1.40 \times 10^{-05}$ |
| rs17218211 | G/A  | 7 | 20707173  | $1.65 \times 10^{-04}$ | $8.88 \times 10^{-05}$ |
| rs3801936  | T/C  | 7 | 107323653 | $6.68 \times 10^{-05}$ | $6.48 \times 10^{-03}$ |

|            |      |   |           |                        |                        |
|------------|------|---|-----------|------------------------|------------------------|
| rs2240627  | G/A  | 7 | 150719581 | 2.30×10 <sup>-05</sup> | 3.20×10 <sup>-02</sup> |
| rs7846606  | G/A  | 8 | 77670168  | 7.48×10 <sup>-04</sup> | 6.82×10 <sup>-06</sup> |
| rs7830040  | T/C* | 8 | 83079508  | 3.99×10 <sup>-03</sup> | 3.47×10 <sup>-05</sup> |
| rs4529421  | G/A  | 8 | 83084534  | 1.16×10 <sup>-03</sup> | 1.25×10 <sup>-05</sup> |
| rs7820074  | C/T  | 8 | 83091153  | 9.68×10 <sup>-04</sup> | 8.55×10 <sup>-06</sup> |
| rs7819401  | G/A  | 8 | 88900831  | 2.81×10 <sup>-02</sup> | 7.45×10 <sup>-06</sup> |
| rs12543318 | C/A  | 8 | 88937456  | 1.02×10 <sup>-06</sup> | 1.90×10 <sup>-08</sup> |
| rs1477915  | T/C* | 8 | 89050656  | 5.35×10 <sup>-04</sup> | 7.15×10 <sup>-05</sup> |
| rs10505528 | T/C  | 8 | 129710034 | 3.19×10 <sup>-05</sup> | 4.14×10 <sup>-05</sup> |
| rs10956433 | C/T  | 8 | 129728946 | 4.56×10 <sup>-05</sup> | 2.01×10 <sup>-04</sup> |
| rs4236736  | A/C  | 8 | 129760428 | 1.72×10 <sup>-05</sup> | 2.55×10 <sup>-05</sup> |
| rs7015145  | A/G  | 8 | 129778467 | 2.30×10 <sup>-13</sup> | 3.38×10 <sup>-12</sup> |
| rs6470648  | G/A  | 8 | 129785490 | 5.40×10 <sup>-07</sup> | 8.98×10 <sup>-05</sup> |
| rs9297775  | A/C  | 8 | 129805894 | 8.14×10 <sup>-13</sup> | 5.92×10 <sup>-12</sup> |
| rs1030608  | A/G  | 8 | 129808934 | 7.53×10 <sup>-12</sup> | 3.43×10 <sup>-07</sup> |
| rs1030609  | A/C  | 8 | 129809059 | 6.72×10 <sup>-12</sup> | 4.49×10 <sup>-07</sup> |
| rs6996786  | T/G  | 8 | 129817168 | 7.79×10 <sup>-12</sup> | 4.61×10 <sup>-11</sup> |
| rs4545057  | C/A  | 8 | 129858316 | 2.49×10 <sup>-08</sup> | 2.30×10 <sup>-08</sup> |
| rs4397367  | A/G  | 8 | 129860721 | 8.29×10 <sup>-07</sup> | 1.12×10 <sup>-04</sup> |
| rs2395855  | T/C  | 8 | 129909921 | 3.17×10 <sup>-16</sup> | 7.18×10 <sup>-14</sup> |
| rs4733653  | C/T  | 8 | 129913853 | 2.32×10 <sup>-12</sup> | 9.84×10 <sup>-09</sup> |
| rs11989880 | T/C  | 8 | 129942164 | 2.77×10 <sup>-18</sup> | 5.89×10 <sup>-15</sup> |
| rs4733532  | G/A  | 8 | 129950481 | 1.21×10 <sup>-15</sup> | 2.43×10 <sup>-14</sup> |
| rs1850889  | A/G  | 8 | 129959587 | 7.07×10 <sup>-17</sup> | 1.44×10 <sup>-16</sup> |
| rs1519850  | G/A  | 8 | 129966003 | 7.95×10 <sup>-16</sup> | 3.77×10 <sup>-15</sup> |
| rs1519849  | A/G  | 8 | 129966149 | 4.05×10 <sup>-16</sup> | 1.49×10 <sup>-14</sup> |
| rs1519847  | A/G  | 8 | 129984942 | 3.49×10 <sup>-20</sup> | 5.47×10 <sup>-21</sup> |
| rs1530300  | C/T  | 8 | 129988640 | 4.90×10 <sup>-23</sup> | 6.31×10 <sup>-22</sup> |
| rs1519841  | G/A  | 8 | 129988982 | 5.90×10 <sup>-20</sup> | 1.80×10 <sup>-20</sup> |
| rs12542837 | C/T  | 8 | 129995843 | 1.25×10 <sup>-20</sup> | 1.02×10 <sup>-20</sup> |
| rs987525   | A/C  | 8 | 130015336 | 3.94×10 <sup>-34</sup> | 5.12×10 <sup>-35</sup> |
| rs12548036 | T/G  | 8 | 130017064 | 8.70×10 <sup>-21</sup> | 2.24×10 <sup>-21</sup> |
| rs7017252  | T/C  | 8 | 130020026 | 8.96×10 <sup>-19</sup> | 1.81×10 <sup>-20</sup> |
| rs12547241 | A/G  | 8 | 130021691 | 2.66×10 <sup>-15</sup> | 9.41×10 <sup>-17</sup> |
| rs1470206  | T/C* | 8 | 130046646 | 1.49×10 <sup>-14</sup> | 2.71×10 <sup>-17</sup> |
| rs882083   | T/C  | 8 | 130051938 | 2.35×10 <sup>-20</sup> | 6.83×10 <sup>-23</sup> |
| rs11787407 | A/G* | 8 | 130054622 | 1.31×10 <sup>-16</sup> | 1.39×10 <sup>-18</sup> |
| rs12546523 | G/A* | 8 | 130055292 | 4.50×10 <sup>-17</sup> | 1.19×10 <sup>-18</sup> |
| rs2004375  | T/C  | 8 | 130071912 | 2.76×10 <sup>-11</sup> | 2.95×10 <sup>-11</sup> |
| rs748978   | T/C  | 8 | 130072298 | 3.83×10 <sup>-16</sup> | 1.27×10 <sup>-14</sup> |
| rs10110974 | C/A  | 8 | 130078969 | 5.55×10 <sup>-07</sup> | 1.26×10 <sup>-06</sup> |
| rs2197111  | T/C  | 8 | 130084897 | 2.35×10 <sup>-11</sup> | 1.26×10 <sup>-08</sup> |
| rs7018275  | C/T  | 8 | 130085681 | 2.44×10 <sup>-11</sup> | 1.30×10 <sup>-08</sup> |
| rs10505532 | A/C  | 8 | 130091143 | 8.88×10 <sup>-07</sup> | 3.43×10 <sup>-06</sup> |
| rs1372452  | A/G  | 8 | 130098216 | 9.74×10 <sup>-12</sup> | 5.63×10 <sup>-09</sup> |
| rs12334809 | T/C  | 8 | 130100188 | 8.27×10 <sup>-12</sup> | 5.86×10 <sup>-09</sup> |
| rs7844734  | T/C  | 8 | 130111323 | 2.35×10 <sup>-07</sup> | 1.39×10 <sup>-06</sup> |
| rs4487715  | T/C  | 8 | 130125163 | 3.07×10 <sup>-07</sup> | 5.26×10 <sup>-06</sup> |
| rs10808576 | G/T  | 8 | 130133153 | 6.00×10 <sup>-07</sup> | 2.88×10 <sup>-07</sup> |
| rs11996876 | C/T  | 8 | 130156354 | 8.35×10 <sup>-10</sup> | 3.56×10 <sup>-08</sup> |
| rs11784932 | A/C  | 8 | 130164660 | 9.38×10 <sup>-07</sup> | 1.07×10 <sup>-06</sup> |
| rs4339605  | C/T  | 8 | 130181350 | 1.13×10 <sup>-06</sup> | 2.06×10 <sup>-06</sup> |
| rs4571700  | T/C  | 8 | 130242649 | 7.47×10 <sup>-06</sup> | 1.10×10 <sup>-05</sup> |
| rs3935421  | C/T  | 8 | 130272321 | 4.00×10 <sup>-10</sup> | 4.55×10 <sup>-09</sup> |
| rs6470706  | T/C  | 8 | 130273916 | 8.15×10 <sup>-05</sup> | 1.05×10 <sup>-03</sup> |
| rs4422741  | C/T  | 8 | 130280510 | 5.52×10 <sup>-10</sup> | 6.09×10 <sup>-09</sup> |

|            |     |    |           |                        |                        |
|------------|-----|----|-----------|------------------------|------------------------|
| rs7819443  | A/G | 8  | 130287862 | 8.88×10 <sup>-06</sup> | 1.60×10 <sup>-03</sup> |
| rs4613964  | A/G | 8  | 130290041 | 7.27×10 <sup>-06</sup> | 1.70×10 <sup>-03</sup> |
| rs7822386  | G/A | 8  | 130293903 | 1.28×10 <sup>-09</sup> | 3.33×10 <sup>-07</sup> |
| rs7826688  | A/G | 8  | 130294193 | 1.20×10 <sup>-09</sup> | 3.22×10 <sup>-07</sup> |
| rs3780136  | A/C | 9  | 36835973  | 9.62×10 <sup>-05</sup> | 3.65×10 <sup>-04</sup> |
| rs9410321  | C/T | 9  | 91220006  | 1.20×10 <sup>-05</sup> | 6.09×10 <sup>-06</sup> |
| rs4132699  | C/A | 9  | 91226247  | 3.52×10 <sup>-05</sup> | 5.20×10 <sup>-07</sup> |
| rs11265876 | G/T | 9  | 91229236  | 2.58×10 <sup>-05</sup> | 1.91×10 <sup>-05</sup> |
| rs10512197 | A/G | 9  | 91230295  | 7.57×10 <sup>-03</sup> | 4.49×10 <sup>-05</sup> |
| rs11999884 | G/A | 9  | 91260211  | 1.86×10 <sup>-02</sup> | 5.67×10 <sup>-05</sup> |
| rs2031970  | T/C | 9  | 91393992  | 2.00×10 <sup>-04</sup> | 1.95×10 <sup>-05</sup> |
| rs7871395  | T/C | 9  | 91399407  | 9.78×10 <sup>-06</sup> | 1.75×10 <sup>-05</sup> |
| rs1475537  | T/C | 9  | 91402570  | 3.25×10 <sup>-05</sup> | 2.01×10 <sup>-05</sup> |
| rs3138512  | A/G | 9  | 91412273  | 2.10×10 <sup>-06</sup> | 2.22×10 <sup>-06</sup> |
| rs3138513  | T/C | 9  | 91412315  | 3.15×10 <sup>-05</sup> | 3.45×10 <sup>-05</sup> |
| rs17539995 | A/G | 9  | 91431667  | 1.23×10 <sup>-03</sup> | 7.30×10 <sup>-05</sup> |
| rs1109998  | C/T | 9  | 91467030  | 1.15×10 <sup>-05</sup> | 3.22×10 <sup>-04</sup> |
| rs4877120  | G/T | 9  | 91469268  | 2.81×10 <sup>-05</sup> | 1.06×10 <sup>-04</sup> |
| rs12352804 | A/G | 9  | 92770879  | 3.03×10 <sup>-03</sup> | 7.96×10 <sup>-05</sup> |
| rs3814127  | C/T | 9  | 128305563 | 9.07×10 <sup>-04</sup> | 4.61×10 <sup>-05</sup> |
| rs10819174 | T/C | 9  | 128307886 | 1.09×10 <sup>-03</sup> | 7.08×10 <sup>-05</sup> |
| rs12356363 | T/C | 10 | 20488292  | 1.19×10 <sup>-04</sup> | 8.59×10 <sup>-05</sup> |
| rs16928239 | A/G | 10 | 72420642  | 8.80×10 <sup>-05</sup> | 1.08×10 <sup>-04</sup> |
| rs17542297 | A/G | 10 | 72444914  | 2.60×10 <sup>-04</sup> | 7.84×10 <sup>-05</sup> |
| rs780689   | A/G | 10 | 72796833  | 1.15×10 <sup>-05</sup> | 6.13×10 <sup>-02</sup> |
| rs2755427  | T/C | 10 | 89407452  | 1.79×10 <sup>-03</sup> | 3.54×10 <sup>-05</sup> |
| rs11197843 | T/G | 10 | 118631386 | 2.02×10 <sup>-05</sup> | 2.97×10 <sup>-05</sup> |
| rs2257791  | G/A | 10 | 118633660 | 1.25×10 <sup>-04</sup> | 3.56×10 <sup>-05</sup> |
| rs10886031 | C/T | 10 | 118794983 | 1.32×10 <sup>-06</sup> | 1.89×10 <sup>-06</sup> |
| rs7078160  | A/G | 10 | 118817550 | 2.81×10 <sup>-08</sup> | 3.96×10 <sup>-11</sup> |
| rs1898355  | A/G | 10 | 118818359 | 2.49×10 <sup>-06</sup> | 7.46×10 <sup>-06</sup> |
| rs4752028  | C/T | 10 | 118824981 | 1.54×10 <sup>-08</sup> | 1.71×10 <sup>-10</sup> |
| rs1393878  | G/A | 11 | 13869322  | 5.40×10 <sup>-02</sup> | 9.94×10 <sup>-05</sup> |
| rs11603089 | G/A | 11 | 18238627  | 2.81×10 <sup>-05</sup> | 1.04×10 <sup>-02</sup> |
| rs1365425  | A/G | 11 | 83811667  | 8.90×10 <sup>-05</sup> | 3.35×10 <sup>-03</sup> |
| rs7950069  | A/G | 11 | 114645763 | 5.90×10 <sup>-03</sup> | 5.03×10 <sup>-06</sup> |
| rs617320   | C/A | 11 | 119466904 | 5.29×10 <sup>-03</sup> | 1.54×10 <sup>-05</sup> |
| rs923811   | G/T | 11 | 128920427 | 7.52×10 <sup>-02</sup> | 6.95×10 <sup>-05</sup> |
| rs722097   | A/G | 12 | 585103    | 2.02×10 <sup>-04</sup> | 1.78×10 <sup>-05</sup> |
| rs3136560  | T/C | 12 | 9807813   | 8.75×10 <sup>-05</sup> | 1.48×10 <sup>-04</sup> |
| rs1554255  | G/A | 12 | 41363753  | 3.36×10 <sup>-05</sup> | 1.62×10 <sup>-05</sup> |
| rs7304375  | C/T | 12 | 41376968  | 2.01×10 <sup>-05</sup> | 1.27×10 <sup>-05</sup> |
| rs727266   | T/C | 12 | 51642678  | 1.49×10 <sup>-03</sup> | 9.82×10 <sup>-05</sup> |
| rs1867445  | A/G | 12 | 68327389  | 3.16×10 <sup>-03</sup> | 1.22×10 <sup>-05</sup> |
| rs1373453  | C/T | 12 | 68341177  | 8.30×10 <sup>-04</sup> | 2.47×10 <sup>-06</sup> |
| rs17106937 | G/A | 12 | 68352547  | 2.95×10 <sup>-03</sup> | 1.60×10 <sup>-05</sup> |
| rs12322558 | G/A | 12 | 68366420  | 3.78×10 <sup>-03</sup> | 7.84×10 <sup>-05</sup> |
| rs6539264  | A/G | 12 | 105215707 | 2.89×10 <sup>-04</sup> | 3.33×10 <sup>-06</sup> |
| rs1532586  | G/A | 12 | 105224714 | 1.61×10 <sup>-03</sup> | 2.25×10 <sup>-05</sup> |
| rs17475847 | T/C | 13 | 19806370  | 8.68×10 <sup>-06</sup> | 2.24×10 <sup>-05</sup> |
| rs4769376  | T/G | 13 | 24092771  | 1.01×10 <sup>-01</sup> | 2.91×10 <sup>-05</sup> |
| rs941823   | A/G | 13 | 39911977  | 8.38×10 <sup>-04</sup> | 5.92×10 <sup>-05</sup> |
| rs9530556  | C/T | 13 | 75999906  | 2.45×10 <sup>-03</sup> | 5.07×10 <sup>-05</sup> |
| rs10492453 | C/T | 13 | 76021534  | 4.45×10 <sup>-03</sup> | 9.90×10 <sup>-05</sup> |
| rs4885678  | T/G | 13 | 79338492  | 9.12×10 <sup>-05</sup> | 4.49×10 <sup>-04</sup> |
| rs9574565  | T/C | 13 | 79566875  | 7.67×10 <sup>-06</sup> | 3.80×10 <sup>-05</sup> |

|            |      |    |           |                        |                        |
|------------|------|----|-----------|------------------------|------------------------|
| rs9601318  | T/C  | 13 | 79571192  | 5.25×10 <sup>-05</sup> | 5.84×10 <sup>-06</sup> |
| rs1575900  | G/T  | 13 | 79574705  | 4.87×10 <sup>-09</sup> | 1.74×10 <sup>-07</sup> |
| rs1327314  | A/G  | 13 | 79581626  | 1.00×10 <sup>-06</sup> | 2.46×10 <sup>-05</sup> |
| rs9318679  | A/C  | 13 | 79588136  | 2.08×10 <sup>-08</sup> | 4.08×10 <sup>-07</sup> |
| rs1215465  | A/G  | 13 | 79589353  | 5.62×10 <sup>-10</sup> | 7.69×10 <sup>-08</sup> |
| rs8001641  | A/G  | 13 | 79590812  | 6.20×10 <sup>-10</sup> | 2.62×10 <sup>-10</sup> |
| rs9545330  | G/A  | 13 | 79597167  | 3.48×10 <sup>-10</sup> | 2.17×10 <sup>-06</sup> |
| rs942233   | G/A  | 13 | 79599849  | 1.69×10 <sup>-08</sup> | 3.34×10 <sup>-07</sup> |
| rs4146682  | G/A  | 13 | 79600066  | 3.77×10 <sup>-06</sup> | 3.86×10 <sup>-07</sup> |
| rs1755254  | G/A  | 13 | 79772282  | 3.43×10 <sup>-05</sup> | 2.78×10 <sup>-03</sup> |
| rs13542    | A/G  | 13 | 99436393  | 1.95×10 <sup>-05</sup> | 1.28×10 <sup>-06</sup> |
| rs2518659  | T/C  | 14 | 30341238  | 9.49×10 <sup>-05</sup> | 1.09×10 <sup>-05</sup> |
| rs2213951  | C/T  | 14 | 30345865  | 1.19×10 <sup>-03</sup> | 7.55×10 <sup>-05</sup> |
| rs8009619  | G/T  | 14 | 77470073  | 7.83×10 <sup>-06</sup> | 8.08×10 <sup>-05</sup> |
| rs10134056 | A/G  | 14 | 80989149  | 3.67×10 <sup>-05</sup> | 1.47×10 <sup>-03</sup> |
| rs11160835 | T/C  | 14 | 104658689 | 1.98×10 <sup>-05</sup> | 1.72×10 <sup>-02</sup> |
| rs3097531  | C/A  | 15 | 25584546  | 4.84×10 <sup>-05</sup> | 6.74×10 <sup>-01</sup> |
| rs17673470 | C/T  | 15 | 25586078  | 3.01×10 <sup>-05</sup> | 6.50×10 <sup>-01</sup> |
| rs1919360  | T/C  | 15 | 30830747  | 7.86×10 <sup>-05</sup> | 9.85×10 <sup>-04</sup> |
| rs1919362  | T/C  | 15 | 30830949  | 2.35×10 <sup>-06</sup> | 2.80×10 <sup>-05</sup> |
| rs1258763  | G/A* | 15 | 30837715  | 5.36×10 <sup>-07</sup> | 1.81×10 <sup>-06</sup> |
| rs3812929  | G/T  | 15 | 30846355  | 6.91×10 <sup>-05</sup> | 2.51×10 <sup>-03</sup> |
| rs3743106  | T/G  | 15 | 30851101  | 5.35×10 <sup>-06</sup> | 2.34×10 <sup>-06</sup> |
| rs11635135 | G/A  | 15 | 31000565  | 4.32×10 <sup>-04</sup> | 3.61×10 <sup>-05</sup> |
| rs2280065  | T/C  | 15 | 55550032  | 9.80×10 <sup>-05</sup> | 2.05×10 <sup>-03</sup> |
| rs1906779  | A/G  | 15 | 61090469  | 8.86×10 <sup>-06</sup> | 3.28×10 <sup>-03</sup> |
| rs8029221  | T/C  | 15 | 61095636  | 4.47×10 <sup>-07</sup> | 5.58×10 <sup>-05</sup> |
| rs1873147  | C/T  | 15 | 61099685  | 2.81×10 <sup>-08</sup> | 7.92×10 <sup>-07</sup> |
| rs12595658 | A/G  | 15 | 61100439  | 1.87×10 <sup>-05</sup> | 3.79×10 <sup>-03</sup> |
| rs6494383  | G/A* | 15 | 61103265  | 2.15×10 <sup>-05</sup> | 4.04×10 <sup>-05</sup> |
| rs11071718 | A/C  | 15 | 61114586  | 3.50×10 <sup>-05</sup> | 5.21×10 <sup>-04</sup> |
| rs8049367  | C/T  | 16 | 3920446   | 4.47×10 <sup>-05</sup> | 8.74×10 <sup>-05</sup> |
| rs1003677  | T/C  | 16 | 6396764   | 7.95×10 <sup>-02</sup> | 8.61×10 <sup>-05</sup> |
| rs12927233 | C/T  | 16 | 32045466  | 4.00×10 <sup>-04</sup> | 5.21×10 <sup>-05</sup> |
| rs4435250  | T/C  | 16 | 53414172  | 1.25×10 <sup>-05</sup> | 1.64×10 <sup>-04</sup> |
| rs11078772 | A/C  | 17 | 8812267   | 1.51×10 <sup>-04</sup> | 3.23×10 <sup>-05</sup> |
| rs2872615  | C/T  | 17 | 8855418   | 7.40×10 <sup>-06</sup> | 4.73×10 <sup>-07</sup> |
| rs9788972  | A/G  | 17 | 8860355   | 5.07×10 <sup>-04</sup> | 2.49×10 <sup>-07</sup> |
| rs1880646  | C/T  | 17 | 8870570   | 3.83×10 <sup>-06</sup> | 3.96×10 <sup>-06</sup> |
| rs9674710  | A/G  | 17 | 8881934   | 3.89×10 <sup>-05</sup> | 3.03×10 <sup>-02</sup> |
| rs8076457  | T/C  | 17 | 8884654   | 4.67×10 <sup>-07</sup> | 2.17×10 <sup>-07</sup> |
| rs8069536  | T/G  | 17 | 8897010   | 1.54×10 <sup>-04</sup> | 1.28×10 <sup>-06</sup> |
| rs8081823  | A/G  | 17 | 8906276   | 3.36×10 <sup>-03</sup> | 7.49×10 <sup>-05</sup> |
| rs17760296 | G/T  | 17 | 51970616  | 9.91×10 <sup>-05</sup> | 2.65×10 <sup>-04</sup> |
| rs12936596 | G/T  | 17 | 52098098  | 6.71×10 <sup>-05</sup> | 6.56×10 <sup>-04</sup> |
| rs12451251 | C/T  | 17 | 52104557  | 5.45×10 <sup>-05</sup> | 5.62×10 <sup>-04</sup> |
| rs12951993 | A/G  | 17 | 52115613  | 5.75×10 <sup>-07</sup> | 3.94×10 <sup>-07</sup> |
| rs1029723  | C/T  | 17 | 52122547  | 4.10×10 <sup>-06</sup> | 1.44×10 <sup>-05</sup> |
| rs227731   | C/A  | 17 | 52128237  | 4.26×10 <sup>-08</sup> | 1.78×10 <sup>-08</sup> |
| rs227730   | G/A  | 17 | 52128950  | 9.56×10 <sup>-07</sup> | 6.27×10 <sup>-06</sup> |
| rs227723   | A/G  | 17 | 52133903  | 1.33×10 <sup>-06</sup> | 2.88×10 <sup>-06</sup> |
| rs8071332  | G/A  | 17 | 58495685  | 4.90×10 <sup>-05</sup> | 5.30×10 <sup>-05</sup> |
| rs9908143  | T/C  | 17 | 60185048  | 2.60×10 <sup>-05</sup> | 5.07×10 <sup>-05</sup> |
| rs2007530  | A/G  | 17 | 60194509  | 5.25×10 <sup>-06</sup> | 4.46×10 <sup>-06</sup> |
| rs1808191  | G/T  | 17 | 60214490  | 2.94×10 <sup>-06</sup> | 4.56×10 <sup>-06</sup> |
| rs2305529  | C/T  | 17 | 71213848  | 1.09×10 <sup>-04</sup> | 4.78×10 <sup>-05</sup> |

|            |     |    |          |                        |                        |
|------------|-----|----|----------|------------------------|------------------------|
| rs3744000  | C/T | 17 | 71215928 | 1.43×10 <sup>-04</sup> | 5.48×10 <sup>-05</sup> |
| rs4789817  | G/A | 17 | 78201278 | 2.03×10 <sup>-03</sup> | 4.93×10 <sup>-05</sup> |
| rs522402   | G/A | 18 | 7028462  | 1.75×10 <sup>-06</sup> | 1.90×10 <sup>-05</sup> |
| rs7238012  | C/T | 18 | 30147038 | 7.40×10 <sup>-05</sup> | 1.81×10 <sup>-01</sup> |
| rs903736   | C/A | 18 | 32355674 | 5.78×10 <sup>-05</sup> | 2.31×10 <sup>-05</sup> |
| rs1565978  | G/A | 18 | 32402506 | 6.58×10 <sup>-05</sup> | 2.19×10 <sup>-03</sup> |
| rs2852945  | G/A | 18 | 43573552 | 4.14×10 <sup>-03</sup> | 5.77×10 <sup>-05</sup> |
| rs880183   | A/G | 19 | 2000314  | 7.92×10 <sup>-06</sup> | 2.97×10 <sup>-03</sup> |
| rs3746101  | T/G | 19 | 2001823  | 7.61×10 <sup>-06</sup> | 4.59×10 <sup>-03</sup> |
| rs6510337  | T/C | 19 | 38237541 | 1.44×10 <sup>-02</sup> | 3.85×10 <sup>-05</sup> |
| rs6029228  | T/G | 20 | 38688962 | 7.18×10 <sup>-03</sup> | 4.76×10 <sup>-06</sup> |
| rs6072081  | A/G | 20 | 38694468 | 1.59×10 <sup>-03</sup> | 9.13×10 <sup>-08</sup> |
| rs6065259  | A/G | 20 | 38695393 | 1.28×10 <sup>-03</sup> | 1.40×10 <sup>-07</sup> |
| rs6102074  | G/T | 20 | 38701599 | 6.64×10 <sup>-03</sup> | 6.90×10 <sup>-06</sup> |
| rs17820943 | T/C | 20 | 38701930 | 9.42×10 <sup>-04</sup> | 1.09×10 <sup>-08</sup> |
| rs13041247 | C/T | 20 | 38702488 | 7.41×10 <sup>-04</sup> | 6.17×10 <sup>-09</sup> |
| rs11696257 | T/C | 20 | 38704230 | 9.00×10 <sup>-04</sup> | 8.02×10 <sup>-09</sup> |
| rs6072087  | C/T | 20 | 38709306 | 8.79×10 <sup>-04</sup> | 3.70×10 <sup>-05</sup> |
| rs6102085  | G/A | 20 | 38715043 | 1.75×10 <sup>-02</sup> | 6.90×10 <sup>-08</sup> |
| rs6016404  | A/C | 20 | 38716134 | 1.57×10 <sup>-02</sup> | 1.22×10 <sup>-05</sup> |
| rs2064278  | T/G | 20 | 48796589 | 2.82×10 <sup>-03</sup> | 2.79×10 <sup>-05</sup> |
| rs6122972  | G/A | 20 | 48808649 | 1.44×10 <sup>-02</sup> | 9.82×10 <sup>-05</sup> |
| rs2834132  | G/A | 21 | 33477703 | 3.52×10 <sup>-04</sup> | 9.96×10 <sup>-05</sup> |
| rs5765956  | C/T | 22 | 43529323 | 1.18×10 <sup>-05</sup> | 2.13×10 <sup>-06</sup> |

<sup>1</sup> - Minor allele first, based on European data (meta\_Euro). SNPs for which the minor allele changes in the European/Asian combined analysis (meta\_all) are marked with \*. Chr. - chromosome.

**Supplementary Table 4: SNPs with genome-wide significance in at least one subgroup analysis.** *P*-values from the meta-analysis in Europeans ( $P_{meta\_Euro}$ ) and the combined analysis of Europeans and Asians ( $P_{meta\_all}$ ) are presented if they reached genome-wide significance, for the subgroups NSCLO (nonsyndromic cleft lip only) and NSCLP (nonsyndromic cleft lip and palate). Both groups are combined in NSCL/P (cleft lip with or without cleft palate). ‘-’ indicates non-genome-wide significant values. Grey shading indicates SNPs for which *P*-values were lower in the subgroup analyses compared to the overall NSCL/P sample.

| dbSNP-ID   | Locus   | NSCL/P                 |                        | NSCLP                  |                        | NSCLO                  |                        |
|------------|---------|------------------------|------------------------|------------------------|------------------------|------------------------|------------------------|
|            |         | $P_{meta\_Euro}$       | $P_{meta\_all}$        | $P_{meta\_Euro}$       | $P_{meta\_all}$        | $P_{meta\_Euro}$       | $P_{meta\_all}$        |
| rs560426   | 1p22.1  | -                      | $3.14 \times 10^{-12}$ | -                      | $5.44 \times 10^{-10}$ | -                      | -                      |
| rs7015145  | 8q24    | $2.30 \times 10^{-13}$ | $3.38 \times 10^{-12}$ | $2.27 \times 10^{-10}$ | $5.72 \times 10^{-10}$ | -                      | -                      |
| rs9297775  | 8q24    | $8.14 \times 10^{-13}$ | $5.92 \times 10^{-12}$ | $2.30 \times 10^{-09}$ | $2.89 \times 10^{-09}$ | -                      | -                      |
| rs1030608  | 8q24    | $7.53 \times 10^{-12}$ | -                      | $2.59 \times 10^{-09}$ | -                      | -                      | -                      |
| rs1030609  | 8q24    | $6.72 \times 10^{-12}$ | -                      | $1.99 \times 10^{-09}$ | -                      | -                      | -                      |
| rs6996786  | 8q24    | $7.79 \times 10^{-12}$ | $4.61 \times 10^{-11}$ | $1.24 \times 10^{-08}$ | $1.45 \times 10^{-08}$ | -                      | -                      |
| rs2395855  | 8q24    | $3.17 \times 10^{-16}$ | $7.18 \times 10^{-14}$ | $9.32 \times 10^{-12}$ | $2.57 \times 10^{-09}$ | -                      | -                      |
| rs4733653  | 8q24    | $2.32 \times 10^{-12}$ | $9.84 \times 10^{-09}$ | $4.66 \times 10^{-09}$ | -                      | -                      | -                      |
| rs11989880 | 8q24    | $2.77 \times 10^{-18}$ | $5.89 \times 10^{-15}$ | $4.33 \times 10^{-12}$ | $4.41 \times 10^{-10}$ | $5.99 \times 10^{-09}$ | -                      |
| rs4733532  | 8q24    | $1.21 \times 10^{-15}$ | $2.43 \times 10^{-14}$ | $4.78 \times 10^{-11}$ | $7.79 \times 10^{-10}$ | -                      | -                      |
| rs1850889  | 8q24    | $7.07 \times 10^{-17}$ | $1.44 \times 10^{-16}$ | $8.44 \times 10^{-12}$ | $5.07 \times 10^{-11}$ | -                      | -                      |
| rs1519850  | 8q24    | $7.95 \times 10^{-16}$ | $3.77 \times 10^{-15}$ | $1.42 \times 10^{-11}$ | $8.41 \times 10^{-11}$ | -                      | -                      |
| rs1519849  | 8q24    | $4.05 \times 10^{-16}$ | $1.49 \times 10^{-14}$ | $3.29 \times 10^{-11}$ | $7.08 \times 10^{-10}$ | -                      | -                      |
| rs1519847  | 8q24    | $3.49 \times 10^{-20}$ | $5.47 \times 10^{-21}$ | $1.71 \times 10^{-16}$ | $1.33 \times 10^{-17}$ | -                      | -                      |
| rs1530300  | 8q24    | $4.9 \times 10^{-23}$  | $6.31 \times 10^{-22}$ | $7.03 \times 10^{-18}$ | $7.00 \times 10^{-18}$ | -                      | -                      |
| rs1519841  | 8q24    | $5.9 \times 10^{-20}$  | $1.80 \times 10^{-20}$ | $2.26 \times 10^{-16}$ | $1.97 \times 10^{-17}$ | -                      | -                      |
| rs12542837 | 8q24    | $1.25 \times 10^{-20}$ | $1.02 \times 10^{-20}$ | $6.37 \times 10^{-17}$ | $9.48 \times 10^{-18}$ | -                      | -                      |
| rs987525   | 8q24    | $3.94 \times 10^{-34}$ | $5.12 \times 10^{-35}$ | $1.79 \times 10^{-26}$ | $1.42 \times 10^{-26}$ | $1.20 \times 10^{-10}$ | $1.96 \times 10^{-11}$ |
| rs12548036 | 8q24    | $8.7 \times 10^{-21}$  | $2.24 \times 10^{-21}$ | $3.73 \times 10^{-17}$ | $1.79 \times 10^{-17}$ | -                      | -                      |
| rs7017252  | 8q24    | $8.96 \times 10^{-19}$ | $1.81 \times 10^{-20}$ | $6.29 \times 10^{-15}$ | $3.41 \times 10^{-16}$ | -                      | -                      |
| rs12547241 | 8q24    | $2.66 \times 10^{-15}$ | $9.41 \times 10^{-17}$ | $6.26 \times 10^{-11}$ | $2.81 \times 10^{-12}$ | -                      | -                      |
| rs1470206  | 8q24    | $1.49 \times 10^{-14}$ | $2.71 \times 10^{-17}$ | $2.51 \times 10^{-10}$ | $1.39 \times 10^{-12}$ | -                      | -                      |
| rs882083   | 8q24    | $2.35 \times 10^{-20}$ | $6.83 \times 10^{-23}$ | $1.98 \times 10^{-16}$ | $2.47 \times 10^{-18}$ | -                      | -                      |
| rs11787407 | 8q24    | $1.31 \times 10^{-16}$ | $1.39 \times 10^{-18}$ | $5.60 \times 10^{-12}$ | $1.46 \times 10^{-13}$ | -                      | -                      |
| rs12546523 | 8q24    | $4.5 \times 10^{-17}$  | $1.19 \times 10^{-18}$ | $2.31 \times 10^{-12}$ | $1.12 \times 10^{-13}$ | -                      | -                      |
| rs748978   | 8q24    | $3.83 \times 10^{-16}$ | $1.27 \times 10^{-14}$ | $1.28 \times 10^{-11}$ | $1.39 \times 10^{-09}$ | -                      | -                      |
| rs2197111  | 8q24    | $2.35 \times 10^{-11}$ | $1.26 \times 10^{-08}$ | $3.74 \times 10^{-08}$ | -                      | -                      | -                      |
| rs7018275  | 8q24    | $2.44 \times 10^{-11}$ | $1.30 \times 10^{-08}$ | $3.85 \times 10^{-08}$ | -                      | -                      | -                      |
| rs1372452  | 8q24    | $9.74 \times 10^{-12}$ | $5.63 \times 10^{-09}$ | $1.35 \times 10^{-08}$ | -                      | -                      | -                      |
| rs12334809 | 8q24    | $8.27 \times 10^{-12}$ | $5.86 \times 10^{-09}$ | $1.44 \times 10^{-08}$ | -                      | -                      | -                      |
| rs7078160  | 10q25   | $2.81 \times 10^{-08}$ | $3.96 \times 10^{-11}$ | -                      | $5.68 \times 10^{-10}$ | -                      | -                      |
| rs4752028  | 10q25   | $1.54 \times 10^{-08}$ | $1.71 \times 10^{-10}$ | -                      | $1.21 \times 10^{-08}$ | -                      | -                      |
| rs1575900  | 13q31.1 | $4.87 \times 10^{-09}$ | -                      | $3.77 \times 10^{-10}$ | -                      | -                      | -                      |
| rs9318679  | 13q31.1 | $2.08 \times 10^{-08}$ | -                      | $2.60 \times 10^{-08}$ | -                      | -                      | -                      |
| rs1215465  | 13q31.1 | $5.62 \times 10^{-10}$ | -                      | $3.21 \times 10^{-10}$ | $2.32 \times 10^{-08}$ | -                      | -                      |
| rs8001641  | 13q31.1 | $6.2 \times 10^{-10}$  | $2.62 \times 10^{-10}$ | $6.51 \times 10^{-11}$ | $8.87 \times 10^{-11}$ | -                      | -                      |
| rs9545330  | 13q31.1 | $3.48 \times 10^{-10}$ | -                      | $9.22 \times 10^{-10}$ | -                      | -                      | -                      |
| rs942233   | 13q31.1 | $1.69 \times 10^{-08}$ | -                      | $7.81 \times 10^{-09}$ | -                      | -                      | -                      |

**Supplementary Table 5: Subgroup analysis of SNPs at chromosome 13q31.1.** Analysis is depicted for the European sample (a) and the combined European/Asian sample (b). Bold-type indicates genome-wide significance in the meta-analysis or nominal significance in the homogeneity likelihood ratio test ( $P_{\text{homog}}$ ).

(a)

| dbSNP-ID  | Position   | Alleles | NSCLO                   |                          |                          | NSCLP                                    |                          |                          | $P_{\text{homog}}$ |
|-----------|------------|---------|-------------------------|--------------------------|--------------------------|------------------------------------------|--------------------------|--------------------------|--------------------|
|           |            |         | $P_{\text{meta\_Euro}}$ | RR het (95% CI)          | RR hom (95% CI)          | $P_{\text{meta\_Euro}}$                  | RR het (95% CI)          | RR hom (95% CI)          |                    |
| rs1575900 | 79,574,705 | G/T     | 0.258                   | 0.916<br>(0.689 - 1.216) | 0.744<br>(0.454 - 1.219) | <b><math>3.77 \times 10^{-10}</math></b> | 0.593<br>(0.493 - 0.714) | 0.447<br>(0.321 - 0.623) | <b>0.024</b>       |
| rs9318679 | 79,588,136 | A/C     | 0.065                   | 0.799<br>(0.601 - 1.062) | 0.674<br>(0.400 - 1.134) | <b><math>2.60 \times 10^{-10}</math></b> | 0.688<br>(0.573 - 0.827) | 0.410<br>(0.283 - 0.595) | 0.28               |
| rs1215465 | 79,589,353 | A/G     | 0.622                   | 0.772<br>(0.578 - 1.031) | 0.704<br>(0.456 - 1.086) | <b><math>3.21 \times 10^{-10}</math></b> | 0.674<br>(0.562 - 0.808) | 0.404<br>(0.296 - 0.553) | 0.113              |
| rs8001641 | 79,590,812 | A/G     | 0.163                   | 1.149<br>(0.818 - 1.615) | 1.329<br>(0.887 - 1.990) | <b><math>6.51 \times 10^{-11}</math></b> | 1.631<br>(1.285 - 2.071) | 2.415<br>(1.842 - 3.166) | <b>0.041</b>       |
| rs9545330 | 79,597,167 | G/A     | 0.025                   | 0.747<br>(0.558 - 0.999) | 0.619<br>(0.349 - 1.097) | <b><math>9.22 \times 10^{-10}</math></b> | 0.637<br>(0.529 - 0.768) | 0.356<br>(0.229 - 0.553) | 0.282              |
| rs942233  | 79,599,849 | G/A     | 0.127                   | 0.834<br>(0.629 - 1.105) | 0.739<br>(0.479 - 1.140) | <b><math>7.81 \times 10^{-09}</math></b> | 0.683<br>(0.567 - 0.822) | 0.450<br>(0.335 - 0.604) | 0.144              |

(b)

| SNP-ID    | Position   | Alleles | NSCLO                  |                          |                          | NSCLP                                    |                          |                          | $P_{\text{homog}}$ |
|-----------|------------|---------|------------------------|--------------------------|--------------------------|------------------------------------------|--------------------------|--------------------------|--------------------|
|           |            |         | $P_{\text{meta\_all}}$ | RR het (95% CI)          | RR hom (95% CI)          | $P_{\text{meta\_all}}$                   | RR het (95% CI)          | RR hom (95% CI)          |                    |
| rs1575900 | 79,574,705 | G/T     | 0.109                  | 0.987<br>(0.769 - 1.267) | 0.725<br>(0.507 - 1.037) | $1.66 \times 10^{-07}$                   | 0.625<br>(0.531 - 0.736) | 0.577<br>(0.462 - 0.720) | <b>0.0055</b>      |
| rs9318679 | 79,588,136 | A/C     | 0.109                  | 0.827<br>(0.663 - 1.032) | 0.807<br>(0.536 - 1.217) | $3.66 \times 10^{-07}$                   | 0.765<br>(0.664 - 0.882) | 0.530<br>(0.401 - 0.701) | 0.240              |
| rs1215465 | 79,589,353 | A/G     | 0.154                  | 0.826<br>(0.657 - 1.037) | 0.820<br>(0.588 - 1.143) | <b><math>2.32 \times 10^{-08}</math></b> | 0.738<br>(0.640 - 0.851) | 0.559<br>(0.448 - 0.696) | 0.139              |
| rs8001641 | 79,590,812 | A/G     | 0.088                  | 1.204<br>(0.925 - 1.568) | 1.349<br>(0.948 - 1.919) | <b><math>8.87 \times 10^{-11}</math></b> | 1.354<br>(1.141 - 1.607) | 2.111<br>(1.686 - 2.641) | 0.062              |
| rs9545330 | 79,597,167 | G/A     | 0.058                  | 0.787<br>(0.628 - 0.987) | 0.788<br>(0.517 - 1.200) | $5.89 \times 10^{-06}$                   | 0.763<br>(0.661 - 0.879) | 0.594<br>(0.448 - 0.788) | 0.527              |
| rs942233  | 79,599,849 | G/A     | 0.062                  | 0.923<br>(0.721 - 1.181) | 0.720<br>(0.514 - 1.009) | $8.12 \times 10^{-07}$                   | 0.706<br>(0.600 - 0.831) | 0.589<br>(0.475 - 0.730) | 0.167              |

NSCLO – nonsyndromic cleft lip only. NSCLP – nonsyndromic cleft lip with cleft palate. RR – relative risk. het – heterozygous. hom – homozygous. CI – confidence interval.



**Supplementary Table 6: Comparison of genotypic relative risks for markers achieving genome-wide significance in one of the two subgroups NSCLO and NSCLP. *P*-values are typed in bold if nominally significant.**

| dbSNP-ID   | Locus   | <i>P</i> <sub>homogeneity</sub> <i>Europeans</i> | <i>P</i> <sub>homogeneity</sub> <i>Europeans and Asians</i> |
|------------|---------|--------------------------------------------------|-------------------------------------------------------------|
| rs560426   | 1p22.1  | 0.954                                            | 0.847                                                       |
| rs7015145  | 8q24    | 0.742                                            | 0.853                                                       |
| rs9297775  | 8q24    | 0.876                                            | 0.920                                                       |
| rs1030608  | 8q24    | 0.968                                            | 0.893                                                       |
| rs1030609  | 8q24    | 0.982                                            | 0.873                                                       |
| rs6996786  | 8q24    | 0.866                                            | 0.941                                                       |
| rs2395855  | 8q24    | 0.427                                            | 0.234                                                       |
| rs4733653  | 8q24    | 0.922                                            | 0.613                                                       |
| rs11989880 | 8q24    | 0.189                                            | 0.507                                                       |
| rs4733532  | 8q24    | 0.838                                            | 0.749                                                       |
| rs1850889  | 8q24    | 0.573                                            | 0.419                                                       |
| rs1519850  | 8q24    | 0.989                                            | 0.936                                                       |
| rs1519849  | 8q24    | 0.822                                            | 0.744                                                       |
| rs1519847  | 8q24    | 0.755                                            | 0.504                                                       |
| rs1530300  | 8q24    | 0.911                                            | 0.746                                                       |
| rs1519841  | 8q24    | 0.749                                            | 0.457                                                       |
| rs12542837 | 8q24    | 0.750                                            | 0.373                                                       |
| rs987525   | 8q24    | 0.724                                            | 0.883                                                       |
| rs12548036 | 8q24    | 0.621                                            | 0.597                                                       |
| rs7017252  | 8q24    | 0.803                                            | 0.775                                                       |
| rs12547241 | 8q24    | 0.408                                            | 0.683                                                       |
| rs1470206  | 8q24    | 0.806                                            | 0.869                                                       |
| rs882083   | 8q24    | 0.836                                            | 0.869                                                       |
| rs11787407 | 8q24    | 0.842                                            | 0.926                                                       |
| rs12546523 | 8q24    | 0.726                                            | 0.870                                                       |
| rs748978   | 8q24    | 0.676                                            | 0.308                                                       |
| rs2197111  | 8q24    | 0.491                                            | 0.109                                                       |
| rs7018275  | 8q24    | 0.490                                            | 0.109                                                       |
| rs1372452  | 8q24    | 0.565                                            | 0.145                                                       |
| rs12334809 | 8q24    | 0.567                                            | 0.136                                                       |
| rs7078160  | 10q25   | 0.903                                            | 0.614                                                       |
| rs4752028  | 10q25   | 0.749                                            | 0.671                                                       |
| rs1575900  | 13q31.1 | <b>0.024</b>                                     | <b>0.006</b>                                                |
| rs9318679  | 13q31.1 | 0.280                                            | 0.240                                                       |
| rs1215465  | 13q31.1 | 0.113                                            | 0.139                                                       |
| rs8001641  | 13q31.1 | <b>0.041</b>                                     | 0.062                                                       |
| rs9545330  | 13q31.1 | 0.282                                            | 0.527                                                       |
| rs942233   | 13q31.1 | 0.144                                            | 0.167                                                       |

**Supplementary Table 7: Subgroup-specific re-analysis of SNPs at the 13q31.1 locus in the EuroCran sample (Mangold et al. 2010).**

| SNP       | Pos        | TDT NSCL/P <sup>a</sup> |     |               | TDT NSCLP |     |                              | TDT NSCLO |    |          |
|-----------|------------|-------------------------|-----|---------------|-----------|-----|------------------------------|-----------|----|----------|
|           |            | T                       | NT  | <i>P</i>      | T         | NT  | <i>P</i>                     | T         | NT | <i>P</i> |
| rs9574565 | 79.566.875 | 227                     | 177 | <b>0.0129</b> | 156       | 110 | <b>4.80×10<sup>-03</sup></b> | 71        | 67 | 0.733    |
| rs1215465 | 79.589.353 | 268                     | 314 | 0.0566        | 168       | 217 | <b>0.0125</b>                | 100       | 97 | 0.831    |
| rs8001641 | 79.590.812 | 275                     | 266 | 0.699         | 198       | 174 | 0.213                        | 77        | 92 | 0.249    |

NSCL/P (nonsyndromic cleft lip with or without cleft palate); NSCLO (nonsyndromic cleft lip without cleft palate); NSCLP (nonsyndromic cleft lip with cleft palate). TDT- transmission disequilibrium test, with transmitted (T) and non-transmitted (NT) alleles. <sup>a</sup>- data are retrieved from <sup>1</sup>. *P*-values are typed in bold if nominally significant.

## Supplementary Figures

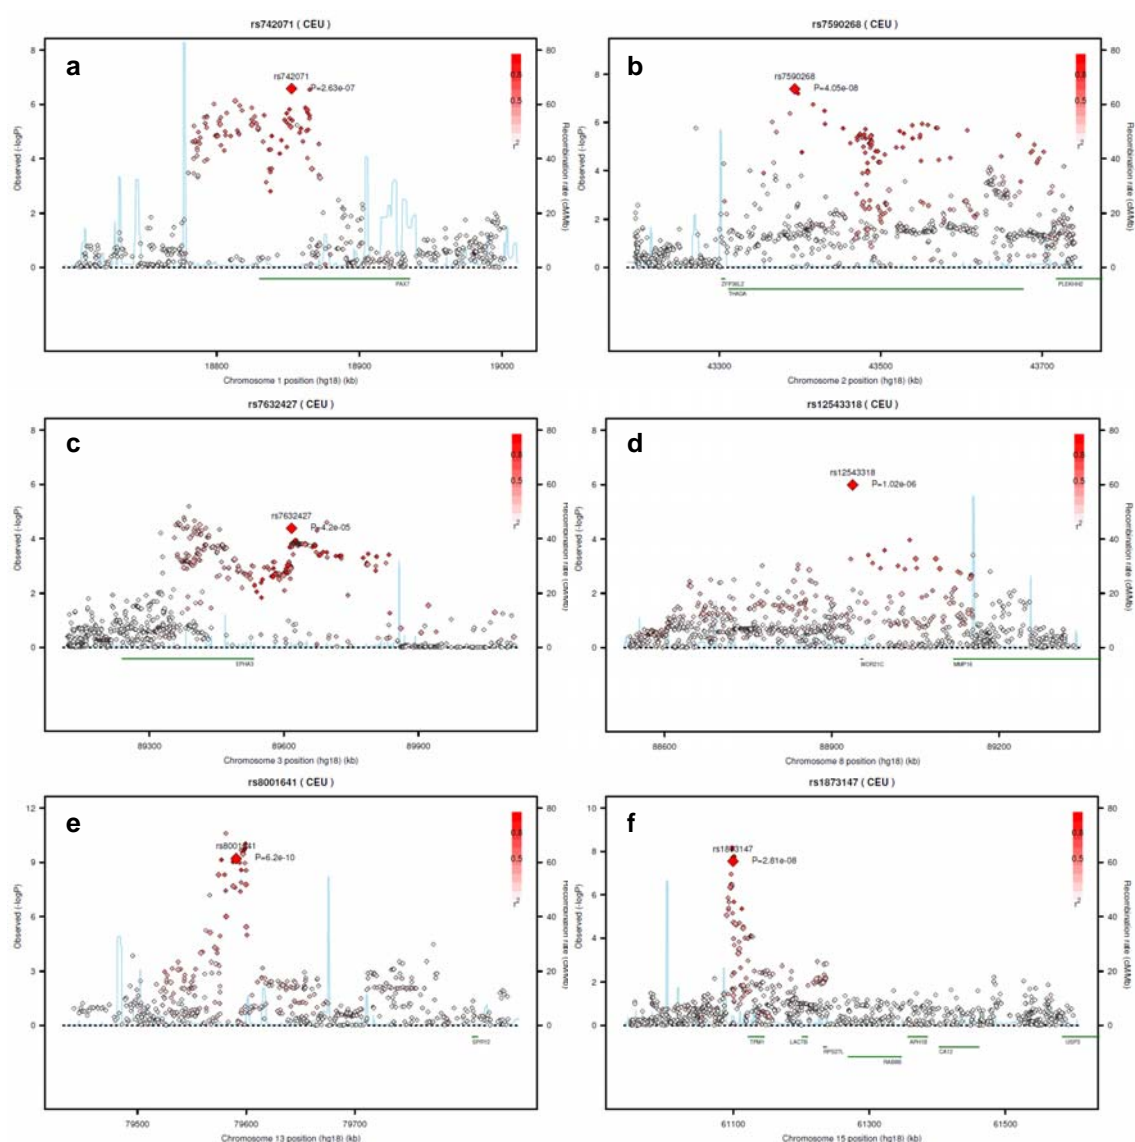

**Supplementary Figure 1:** Regional association plots for the new genome-wide significant loci in the European sample (meta<sub>Euro</sub>), based on imputed data. For each of the loci in (a) to (f), single-marker association statistics (as  $-\log_{10} P$ ; left y axis) are shown. Color-codes demonstrate LD estimates to the most strongly associated genotyped SNP, and recombination rates across each region are shown in light blue (right y axis; both based on 1000genomes\_release1). The chromosomal locations and relative positions of genes according to hg18 are shown (x axis). Windows have been chosen to include adjacent recombination hotspots, with a maximum of 500 kb either side of the top SNP. Note the different scaling of the y-axes, and the lack of genome-wide significance in (a), (c), and (d). For these three loci, genome-wide significance was achieved after adding the Asian data (meta<sub>all</sub>).

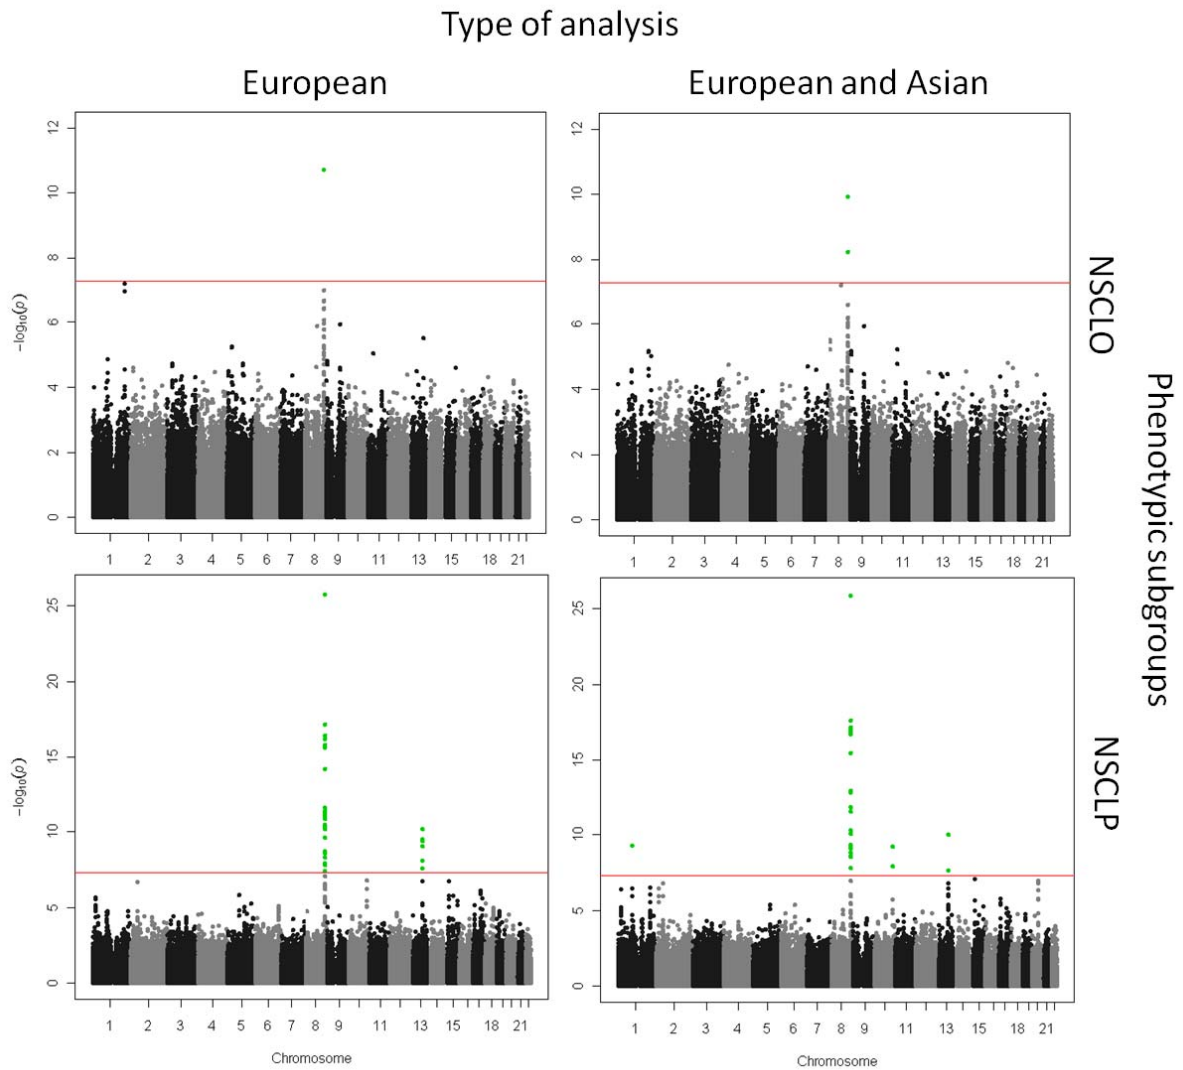

**Supplementary Figure 2:** Results of the genome-wide meta-analyses for the NSCL/P subgroups for both types of analyses (Europeans and combined sample). Negative  $\log_{10}$   $P$ -values are shown for all SNPs that passed quality control. Genome-wide significance ( $P < 5 \times 10^{-08}$ ) is indicated by the red line. SNPs passing this threshold are shown in green. Note the different scaling of the y-axis in the NSCLP and NSCLO groups.

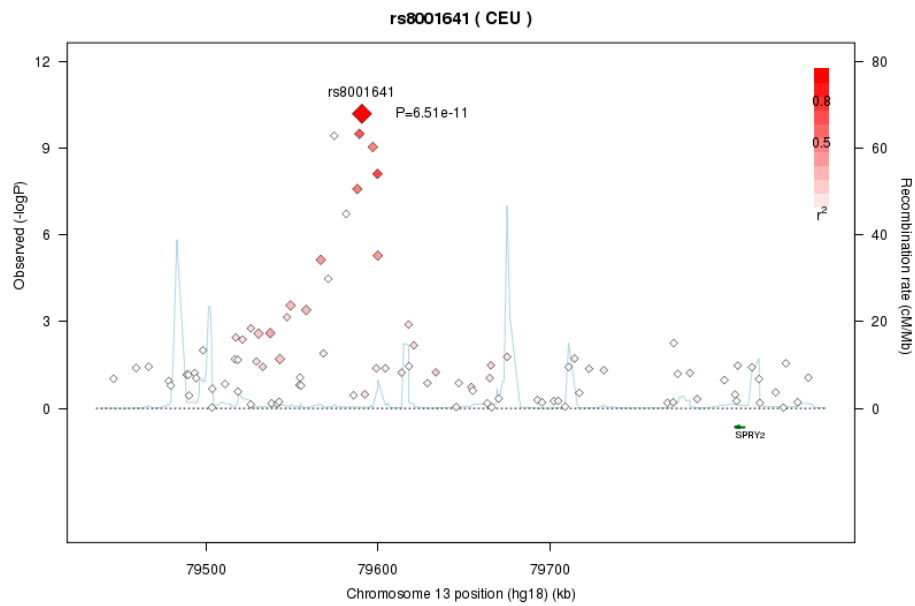

**Supplementary Figure 3:** Details of the 13q31 locus that showed genome-wide significant association with NSCLP in the European sample. Single-marker association statistics (as  $-\log_{10} P$ ; left y axis) are shown, with color-coding to demonstrate linkage disequilibrium estimates (HapMap3 CEU) to the most strongly associated SNP rs8001641. Recombination rates across each region in HapMap CEU are shown in light blue (right y axis). The chromosomal locations and relative positions of genes according to hg18 are shown (x axis).

## Supplementary Note

We acknowledge our collaborating clinical partners, including Martin Scheer, Mitra Saffar, Hubertus Koch, Charlotte Opitz, Michael Krimmel, and Karsten Gundlach, for their support in contacting patients. The European Collaboration on Craniofacial Anomalies (EUROCRAN) included contributions from Roberto Brusati, Giovanna Garattini, Elisa Calzolari, Maurizio Accordi and Andrea Franchella (Italy), William C Shaw, Pauline Nelson, and Pamela Houston (UK), Sabina de Weerd and Ingrid Krapels (Netherlands), Vesna Kozelj and Borut Peterlin (Slovenia), Youri Anastassov (Bulgaria), Siiri Hanstein (Estonia), Andrew Czeizel (Hungary), Irena Klimova (Slovak Republic), and Julian Little (Canada). We also thank Susanne Raeder, Annegret Reinscheid, and Michela Arbustini for their skilled laboratory work, and Henning Henschke and Amalia Diaz Lacava for their reliable and accurate database management. In particular, we thank Susanne Moebus, Stefan Schreiber, Michael Krawczak, Thomas Meitinger, Hans-Erich Wichmann, and Bernhard Hosthemke, who contributed data on the population-based controls used in the Bonn-II GWAS. The Heinz Nixdorf Recall cohort was established with the generous support of the Heinz Nixdorf Foundation, Germany (Chairman: G. Schmidt). The POPGEN biobank is financed by the Ministry of Science, Economy, and Transport of Schleswig-Holstein, Germany. The Kooperative Gesundheitsforschung in der Region Augsburg (KORA) research platform was initiated and financed by the Helmholtz Center Munich / German Research Center for Environmental Health, and which is funded by the German Federal Ministry of Education and Research and by the state of Bavaria. The work of KORA is supported by the German Federal Ministry of Education and Research (BMBF) within the context of the German National Genome Research Network (NGFN-2 and NGFN-plus). The EUROCRAN study was supported by the European Commission FP5 (contract no. QLGI-CT-2000-01019), and the ITALCLEFT study was supported by a FAR-2008 grant from the University of Ferrara, Italy.

**dbGaP:** Funding support for the study entitled “International Consortium to Identify Genes and Interactions Controlling Oral Clefts” was provided by several previous grants from the National Institute of Dental and Craniofacial Research (NIDCR). Data and samples were drawn from several studies performed by members of this consortium. Funding to support original data collection, previous genotyping, and analysis was provided to individual investigators from several sources. Funding for individual investigators included: R21-DE-013707 and R01-DE-014581 (Beaty); R37-DE-08559 and P50-DE-016215 (Murray, Marazita); the Iowa Comprehensive Program to Investigate Craniofacial and Dental Anomalies (Murray); R01-DE-09886 (Marazita); R01-DE-012472 (Marazita); R01-DE-014677 (Marazita); R01-DE-016148 (Marazita); R21-DE-016930 (Marazita); and R01-DE-013939 (Scott). Parts of this research were supported by the Intramural Research Program of the NIH, National Institute of Environmental Health Sciences (Wilcox, Lie). Additional recruitment was supported by the Smile Train Foundation for recruitment in China (Jabs, Beaty, Shi) and a grant from the Korean government (Jee). The genome-wide association study, also known the International Cleft Consortium, is part of the Gene Environment Association Studies (GENEVA) program of the trans-NIH Genes, Environment, and Health Initiative [GEI] supported by U01-DE-018993. Genotyping services were provided by the Center for Inherited Disease Research (CIDR). CIDR is fully funded through a federal contract from the National Institutes of Health (NIH) to The Johns Hopkins University, contract number HHSN268200782096C. Funds for genotyping were provided by the NIDCR through CIDR’s NIH contract. Assistance with genotype cleaning, as well as with general study coordination, was provided by the GENEVA Coordinating Center (U01-HG-004446) and by the National Center for Biotechnology Information (NCBI). We sincerely thank all of the patients and families at each recruitment site for participating in this study, and we gratefully acknowledge the invaluable assistance of all clinical, field, and laboratory staff who contributed to this effort over the years.

## References

1. Mangold, E. et al. Genome-wide association study identifies two susceptibility loci for nonsyndromic cleft lip with or without cleft palate. *Nat Genet* **42**, 24-6 (2010).
2. Schaid, D.J. & Sommer, S.S. Genotype relative risks: methods for design and analysis of candidate-gene association studies. *Am J Hum Genet* **53**, 1114-26 (1993).
3. Howie, B.N., Donnelly, P. & Marchini, J. A flexible and accurate genotype imputation method for the next generation of genome-wide association studies. *PLoS Genet* **5**, e1000529 (2009).
4. Southam, L. et al. The effect of genome-wide association scan quality control on imputation outcome for common variants. *Eur J Hum Genet* **19**, 610-4 (2011).
